1 Title: Genetically-modified *X. laevis* indicate distinct roles for prominin-1 and photoreceptor  
2 cadherin in outer segment morphogenesis and retinal dystrophy.

3

4 Authors: Carr, Brittany J<sup>1</sup>, Stanar, Paloma<sup>1</sup>, Moritz, Orson L<sup>1</sup>.

5 1. Department of Ophthalmology and Visual Sciences, Faculty of Medicine, University of  
6 British Columbia, 330-2550 Willow St., Vancouver, British Columbia, Canada, V5Z 3N9.

7

8 Corresponding Author: Dr. Brittany J. Carr, [bjcarr@mail.ubc.ca](mailto:bjcarr@mail.ubc.ca), +1-604-875-4648

9

10 Abbreviated Title: Two models of cone-rod dystrophy in African clawed frog.

11

12 Keywords: retinal degeneration, photoreceptor, molecular genetics, molecular cell biology,  
13 prominin-1, photoreceptor cadherin, cone-rod dystrophy, electroretinography, confocal  
14 microscopy, super-resolution microscopy, transmission electron microscopy

15

16 Conflict of Interest Statement: The authors declare that they have no conflicts of interest with the  
17 contents of this article.

18

19 Acknowledgements: Research funded by the Canadian Institutes of Health Research (OLM; PJT-  
20 155937, PJT-156072), the Natural Sciences and Engineering Research Council of Canada (OLM;  
21 RGPIN-2015-04326), the Edwina and Paul Heller Memorial Fund (OLM/BJC), and a Michael  
22 Smith Foundation for Health Research Research Trainee Award (BJC; 18367). Purchase of the  
23 Zeiss LSM 800 and LSM 880 with Airyscan funded by an infrastructure grant from the Canadian

24 Foundation for Innovation (OLM). Transmission electron microscopy imaging supported by the  
25 University of British Columbia Bioimaging Facility and staff.

26

## 27 ABSTRACT

28 Mutations in prominin-1 (*prom1*) and photoreceptor cadherin (*cdhr1*) are associated with inherited  
29 retinal degenerative disorders such as retinitis pigmentosa, cone-rod dystrophy, and juvenile  
30 macular dystrophy. The proteins encoded by these genes are hypothesized to regulate  
31 photoreceptor outer segment disc morphogenesis, but their functions remain unknown. We used  
32 CRISPR/Cas9 to generate *prom1*-, *cdhr1*-, and *prom1 + cdhr1*-null *X. laevis* and then documented  
33 the effects of these mutations on photoreceptor structure and function. *Prom1*-null mutations  
34 resulted in dysmorphic photoreceptors comprised of overgrown and disorganized disc membranes.  
35 Cones were more severely affected than rods; outer segments were elongated and fragmented, and  
36 ERG response was impaired. Autofluorescent deposits in the outer segment layer of aging *prom1*-  
37 null animals indicate that secondary toxic effects to the retina or RPE drive retinal degeneration  
38 for this mutation, instead of direct effects on outer segment disc morphogenesis. *Cdhr1*-null  
39 photoreceptors did not appear grossly dysmorphic, but ultrastructural analysis revealed that some  
40 disc membranes were overgrown or aligned vertically within the plasma membrane. *Prom1 +*  
41 *cdhr1*-null mutants did not differ significantly from *prom1*-null mutants. Our results indicate that  
42 neither *prom1* nor *cdhr1* are necessary for outer segment disc membrane evagination or the  
43 membrane fusion event involved in disc sealing. Rather, they are necessary for higher-order  
44 organization of the nascent outer segment discs. *Prom1* may align and reinforce interactions  
45 between the disc leading edges, a function more critical in cone photoreceptors for structural

46 support. *Cdhr1* may help to align nascent discs and maintain horizontal disc orientation prior to  
47 fusion.

48

## 49 INTRODUCTION

50 The retina is a light-sensitive neural tissue that initiates vision through rod and cone photoreceptors,  
51 which are named for the shape of their outer segments (OS) – a highly-modified primary cilia. Rod  
52 outer segments (ROS) are cylindrical and comprised of stacks of discrete membranous discs  
53 sheathed in a plasma membrane. Cone outer segments (COS) are tapered and comprised of open  
54 discs formed by infoldings of a continuous membrane. OS morphogenesis is dynamic; new  
55 membrane discs are synthesized continuously by plasma membrane evaginations at the basal ROS  
56 and COS (1–4). Deficiencies in this process can result in retinal degenerative disease (5).

57

58 Inherited retinal degenerative diseases are rare disorders that result in progressive vision loss and  
59 blindness. Defects in prominin-1 (*prom1*) and cadherin-related family member-1 (*cdhr1*) can result  
60 in autosomal dominant Stargardt-like macular dystrophy (6, 7) or autosomal recessive cone-rod  
61 dystrophies and/or retinitis pigmentosa (8, 9). The proteins encoded by these genes share a unique  
62 localization to the basal ROS and COS where nascent discs are synthesized, which has led to the  
63 hypothesis that mutant *prom1* and *cdhr1* cause retinal degeneration by disruption of OS  
64 morphogenesis (Rattner et al., 2001; Zacchigna et al., 2009; Han et al., 2012).

65

66 *Prom1* – a.k.a. prominin-like 1, CD133, or AC133 – encodes a pentaspan transmembrane  
67 glycoprotein that is evolutionarily conserved between vertebrates and invertebrates (12). It is  
68 hypothesized to be involved in ectosome formation (13), neurodevelopmental signalling (14),

69 stabilization of membrane curvature (15), and cytoskeletal remodelling (16). Interestingly,  
70 however, the only documented clinical manifestation of *prom1* mutations is non-syndromic vision  
71 loss (9). *Prom1*-null mice exhibit dysmorphic ROS and COS, mislocalized rod and cone opsins,  
72 increased photoreceptor apoptosis, and impaired retinal function; retinal degeneration occurs  
73 within 3-26 weeks, depending on the genetic background of the mouse model used (11, 17). ROS  
74 disorganization, lipofuscin-like deposits in the RPE, a reduced scotopic and photopic  
75 electroretinogram B wave, and retinal degeneration also occur, by 4-7 weeks, in mice with  
76 overexpression of the autosomal dominant mutation, *prom1*<sup>R373C</sup> (18). It has been suggested that  
77 *prom1* and *cdhr1* proteins form a complex that performs a shared role in OS morphogenesis  
78 because *cdhr1* is mislocalized in *prom1*<sup>R373C</sup> mice, mouse *prom1* is mislocalized in *cdhr1*<sup>-/-</sup> mice,  
79 and *prom1* coimmunoprecipitates with *cdhr1* in HEK293 cells cotransfected with either wildtype  
80 or mutant *prom1* and a *cdhr1*-Myc fusion construct (18).

81  
82 *Cdhr1* – cadherin-related family member 1 a.k.a protocadherin-21 (*pcdhr-21*) or photoreceptor  
83 cadherin (*prCAD*) – encodes a single-pass transmembrane protein expressed exclusively in the  
84 retina; orthologues have been identified in mammals, birds, fish and amphibians, but not  
85 invertebrates (8). *Cdhr1*-null mice have dysmorphic ROS and increased retinal apoptotic activity  
86 and degeneration by 6 months (8). Mammalian *cdhr1* is proteolytically-cleaved in the  
87 photoreceptors, resulting in an extracellular soluble N-terminal fragment and a C-terminal  
88 fragment that remains embedded in the plasma membrane. It has been hypothesized that cleavage  
89 of *cdhr1* may drive OS assembly by acting as an essential, irreversible step, such as the “release”  
90 mechanism during plasma membrane fission in ROS that seals off discs (19). Alternatively, *cdhr1*

91 has been reported to act as a tether between the leading edge of nascent ROS discs and the inner  
92 segment (2).

93

94 Despite studies demonstrating that loss of *prom1* or *cdhr1* causes photoreceptor OS defects and  
95 retinal degeneration in mice, their roles in OS morphogenesis and the mechanisms of pathogenicity  
96 remain unknown. Here, we report the characterization of genetically-modified *prom1*-null, *cdhr1*-  
97 null, and *prom1 + cdhr1*-null *X. laevis*, which provide new insights into the roles of these proteins  
98 in photoreceptor OS morphogenesis and retinal degenerative disease.

99

## 100 METHODS

### 101 Animal ethics statement & housing

102 Animal use protocols were approved by the University of British Columbia Animal Care  
103 Committee and carried out in accordance with the Canadian Council on Animal Care and the  
104 ARVO Statement for the Use of Animals in Ophthalmic and Vision Research. Animals were  
105 housed at 18°C under a 12-hour cyclic light schedule (900-1200 lux).

106

### 107 RNA identification, construction, and synthesis

108 Single-guide RNAs (sgRNAs) were synthesized on the basis of *X. laevis prom1* and *cdhr1*  
109 sequences identified by xenbase.org (*prom1*: xelaev18005149m, NCBI Gene ID: 100316924  
110 (*prom1-1*); *cdhr1*: xelaev18035010mg, XB-GENE-865231, NCBI Gene ID: 100337587 (*cdhr1.L*)  
111 & xelaev18000599mg, XB-GENE-17339736, NCBI Gene ID: 108703385 (*cdhr1.S*). SgRNAs,  
112 corresponding oligonucleotides, and primer sequences were designed *in silico* using ChopChop  
113 (<http://chopchop.cbu.uib.no/>), ZiFiT (<http://zifit.partners.org>), and Integrated DNA Technologies

114 OligoAnalyzer ([idtdna.com/calc/analyzer](http://idtdna.com/calc/analyzer)) online tools. The sgRNA target sequences,  
115 corresponding complementary oligonucleotides for cloning into the pDR274 vector, and PCR  
116 primer sequences used for subsequent genotyping are listed in Table 1.

117

118 Table 1. SgRNA targets, corresponding complementary oligonucleotides, and genotyping PCR  
119 primers used in this study.

| Target<br>Gene/Exon        | sgRNA target + PAM<br>(Forward) | Corresponding Oligos<br>(pDR274 vector)          | PCR Primers<br>(F: Forward; R: Reverse)              |
|----------------------------|---------------------------------|--------------------------------------------------|------------------------------------------------------|
| <i>prom1</i> L<br>exon 1   | ggatgcctaccatgagcctgggg         | taggatgcctaccatgagcctg<br>aaaccaggctcatggtaggcat | F: ctgtcagaaagaactctgcct<br>R: gttaaagtgcctattttgcca |
| <i>chdr1</i> L/S<br>exon 7 | ggagttttgaggataaaagcggg         | taggagttttgaggataaaagc<br>aaacgcttttaccctcaaaact | F: gctccaatcgagttgtaag<br>R: cttgctcataccttccatg     |

120

121 To synthesize sgRNAs, oligonucleotides encoding targeting sequences were cloned into pDR274  
122 (a gift from Keith Joung - Addgene plasmid #42250) and the resulting derivatives were linearized  
123 and used as templates for *in vitro* RNA transcription with the HiScribe™ T7 High Yield RNA  
124 Synthesis Kit (NEB, Ipswich, MA, USA); 1.5 µg template was incubated for 4 hrs following kit  
125 protocols. Cas9 mRNA was transcribed *in vitro* from linearized pMLM3613 (a gift from Keith  
126 Joung - Addgene plasmid #42251) using the HiScribe T7 ARCA mRNA kit with poly-A tailing  
127 (NEB, Ipswich, MA, USA). A combination of 3 separate reactions was used to achieve high  
128 concentrations ( $\geq 45$  µg) of Cas9 mRNA. eGFP mRNA was transcribed *in vitro* from a linearized  
129 pBluescript II SK+ construct using the T7 mMessage Ultra kit (Ambion/ThermoFisher Scientific,  
130 Waltham, MA, USA). All synthesized RNA was treated with DNase I (NEB, Ipswich, MA, USA)

131 to remove template contamination, and then purified using the Qiagen RNeasy kit (Hilden,  
132 Germany). Final products were quantified by absorbance at 260/280 nm with a NanoDrop 2000c  
133 spectrophotometer (ThermoFisher Scientific, Waltham, MA, USA), evaluated for size and quality  
134 by agarose gel electrophoresis (1.5%), and stored at -80°C prior to use.

135

136 Microinjections, embryo selection, and tadpole rearing

137 *In vitro* fertilization and microinjections were performed at 18°C as previously described (20).

138 Eggs and sperm were incubated in a petri dish for 20 min, the follicle cell sheath was removed

139 from fertilized embryos using 2% cysteine and gentle shaking, and then the embryos were tightly

140 packed into a monolayer in 2% agarose injection plates flooded with 0.4x MMR + 6% Ficoll. Cas9

141 mRNA (5 ng), eGFP mRNA (750 pg), and sgRNAs (1.25-2 ng) were combined and loaded into a

142 pulled glass micropipette with a 20–25 µm bore. Micropipettes were mounted in a

143 micromanipulator and connected to 25 µL Hamilton gastight syringes mounted in a Hamilton

144 syringe pump set to deliver 36 µL/hour. Embryos were injected with the RNA solution for 1s

145 (equal to ~10 nL). Injected embryos that exhibited symmetrical division at the 4-cell stage were

146 transferred to 6% Ficoll + 10µg/mL gentamycin in 0.1x MMR at 18°C. At 1-3 dpf, surviving

147 embryos were screened for eGFP fluorescence using an epifluorescence-equipped Leica MZ16F

148 dissecting microscope; uniformly fluorescent embryos were selected and transferred to 1x tadpole

149 ringer (10 mM NaCl, 0.15 mM KCl, 0.24 mM CaCl<sub>2</sub>•H<sub>2</sub>O, 0.1 mM MgCl<sub>2</sub>•H<sub>2</sub>O). Tadpoles were

150 raised in a 12:12 cyclic light incubator at 18°C.

151

152 Confirmation and characterization of CRISPR-mediated indels

153 Whole embryos (1-3 dpf) or tail snips (14 dpf and older) were used for genomic DNA extraction.  
154 Tissues were placed in 75  $\mu$ L of genomic prep buffer (50  $\mu$ M Tris-HCl pH 8.5 + 1  $\mu$ M EDTA +  
155 0.5% Tween 20 + 0.2 mg/mL proteinase K) and incubated at 55°C for 2 hrs and 95°C for 10 min.  
156 Extracted genomic DNA was used as template for PCR amplification of target exon sequences  
157 using the primers listed in Table 1. Primers and free nucleotides were removed by ExoSAP enzyme  
158 treatment (37°C for 30 min and then 95°C for 5 min) and the products were analyzed by Sanger  
159 sequencing (Genewiz, Seattle, WA).

160

161 Fluorescence immunohistochemistry & Lucifer yellow dye

162 For fluorescence immunohistochemistry, whole eyes were fixed in 4% paraformaldehyde + 3%  
163 sucrose in 0.1 M sodium phosphate buffer (PB; pH 7.4) overnight at 4°C. Fixed eyes were then  
164 cryoprotected in 0.1 M PB + 20% sucrose (pH 7.4) for 3 hrs at 22°C with gentle shaking or 18-48  
165 hrs at 4°C without shaking. Cryoprotected eyes were embedded in Optimal Cutting Temperature  
166 medium (OCT; ThermoFisher, Waltham, MA, USA) and then quick-frozen to -80°C. Sagittal or  
167 coronal cryosections of the central retina were cut at 12  $\mu$ m, thaw-mounted onto Fisherbrand  
168 Superfrost Plus slides and stored at -20°C until use.

169

170 For immunolabelling, sections were washed (3 x 8 min) in 1x phosphate buffered saline (PBS) and  
171 then incubated in blocking buffer (1% goat serum + 0.1% TX-100 in 1x PBS) for 30-45 min. After  
172 blocking, sections were washed and then incubated overnight in primary antibody in dilution  
173 buffer (0.1% goat serum + 0.1% TX-100 in 1x PBS). After incubation, sections were washed and  
174 then secondary antibodies and counterstains were applied in dilution buffer and incubated for 4-6  
175 hrs at 22°C; all tissues were counterstained with Hoechst 33342 and fluorophore-conjugated wheat



176 germ agglutinin (WGA) to visualize nuclei and photoreceptor OS membranes. Sections were  
 177 cover-slipped using Mowiol mounting medium (Millipore Sigma, St. Louis, MO, USA) and  
 178 imaged using a Zeiss 510 or 800 confocal microscope equipped with a 40x N.A. 1.2 water  
 179 immersion objective or a Zeiss LSM 880 with Airyscan equipped with a 63x 1.4 N.A. oil  
 180 immersion objective. Sections were double-labelled in pairs – rhodopsin/cone opsin, cdhr1/prph-  
 181 2, prom1/WGA – to maximize tissue use from small tadpole eyes. Antibody sources, counterstains,  
 182 and concentrations used are listed in Table 2. Micrographs represent maximum intensity  
 183 projections of whole retinal sections ( $z = 0.28 \mu\text{m}/\text{step}$ ) unless specified otherwise.

184

185 Table 2. Antigens, species/type, source, and working dilutions of antibodies used in this study.

| Antigen                                                 | Species/Type              | Source                    | Dilution                      |
|---------------------------------------------------------|---------------------------|---------------------------|-------------------------------|
| Primary Antibodies                                      |                           |                           |                               |
| <i>X. laevis</i> prominin-1<br>(N-terminus)             | rabbit polyclonal         | D.S. Papermaster          | IHC: 1:750<br>WB: 1:1000      |
| <i>X. laevis</i> cone opsin<br>(red-sensitive)          | rabbit polyclonal         | O.L. Moritz               | IHC: 1:500<br>WB: 1:1000      |
| <i>X. laevis</i> peripherin-2<br>(2A5)                  | mouse monoclonal          | R. S. Molday              | IHC: 1:10                     |
| <i>X. laevis</i> rhodopsin<br>(B630N)                   | mouse monoclonal          | P. Hargrave               | IHC: 1:15<br>WB: 1:15         |
| <i>X. laevis</i> photoreceptor<br>cadherin (N-terminus) | rabbit polyclonal         | O.L. Moritz               | IHC: 1:10,000<br>WB: 1:10,000 |
| Secondary Antibodies                                    |                           |                           |                               |
| conjugated WGA                                          | AF488, AF594, AF647       | Life Technologies         | 1:100 - 1:1,000               |
| Hoechst 33342                                           | nuclear stain             | Sigma Aldrich             | 0.1 mg/mL                     |
| AF488                                                   | anti-mouse<br>anti-rabbit | Jackson<br>ImmunoResearch | 1:750                         |

|     |                           |                           |       |
|-----|---------------------------|---------------------------|-------|
| Cy3 | anti-mouse<br>anti-rabbit | Jackson<br>ImmunoResearch | 1:750 |
|-----|---------------------------|---------------------------|-------|

186

187 To label photoreceptor disc membranes with Lucifer yellow, a “peeled grape preparation” of whole  
188 eyes was performed. This is suitable for tadpoles and froglets, but works best in animals whose  
189 scleras have not been hardened by cartilaginous growth. Using a 30 gauge needle and extra fine  
190 forceps, the sclera was split open and then gently peeled away, along with the RPE, leaving a globe  
191 comprised of the retina and intact lens. The retina-lens globes were then incubated in 20  $\mu$ L of  
192 0.4% Lucifer yellow-VS lithium salt in 60% L15 culture medium for 45 min at room temperature.  
193 Excess dye was removed by using a transfer pipette to drop in and remove the globes from 3  
194 different Eppendorf tubes filled with 1000  $\mu$ L of clean 60% L15. Rinsed globes were then fixed  
195 and prepared for imaging the same way as whole eyes for fluorescence immunohistochemistry  
196 (described above).

197

#### 198 Transmission Electron Microscopy (TEM)

199 Detailed methods for TEM tissue preparation are published elsewhere (21). Briefly, whole eyes  
200 were fixed in 4% paraformaldehyde + 1% glutaraldehyde in 0.1 M PB at 4°C for  $\geq$  24 hrs. Fixed  
201 eyes were then infiltrated with 2.3 M sucrose in 0.1 M PB for 1-4 hrs at 22°C with gentle shaking,  
202 embedded in OCT (ThermoFisher, Waltham, MA, USA), cryosectioned at 20  $\mu$ m, and then thaw-  
203 mounted (one section per slide) onto gelatin-coated Fisherbrand Superfrost Plus slides. Optimally-  
204 oriented sections were washed with 0.1 M sodium cacodylate and then stained for 30 min with 1%  
205 osmium tetroxide. After staining, sections were dehydrated in increasing concentrations of  
206 anhydrous ethanol and then infiltrated with increasing concentrations of Eponate 12 resin (Ted  
207 Pella Inc., Redding, CA, USA) diluted with anhydrous EtOH. Once tissues were infiltrated with

208 100% resin, Beem<sup>®</sup> capsules with the ends trimmed off were placed over the section on the slide  
209 and then the capsule was filled with resin and allowed to polymerize (16-24 hrs at 65°C). Ultrathin  
210 sections (silver-grey; 50-70 nm) were cut with a diamond knife and collected on 0.5% Formvar-  
211 coated nickel slot grids. Sections were stained with saturated aqueous uranyl acetate (12 min) and  
212 Venable and Coggeshall's lead citrate (0.25%, 5 min). Imaging was performed with a Hitachi 7600  
213 TEM at 80 kV.

214

215 SDS-PAGE, Western blot, and dot blot

216 Single retinas from tadpoles aged > 45 days post-fertilization (minimum equatorial diameter ~1.6  
217 mm) were isolated from the eye cup and solubilized in 50 µL of solubilizing buffer (1x PBS, 2.5%  
218 SDS, 5 mM Tris pH 6.8, 20% sucrose, bromophenol blue, 2 mM EDTA, 1 mM PMSF, 4% β-  
219 mercaptoethanol). Protein samples (12 µL) were separated with a 10% SDS-PAGE resolving gel  
220 using the Laemmli discontinuous buffer system and then transferred to a PVDF transfer  
221 membrane (Immobilon-FL, Merck KGaA, Darmstadt, Germany) using a Biorad wet transfer  
222 apparatus. Blots were blocked for 30 min (1% skim milk in 1x PBS) and then probed with anti-N  
223 cdhr-21 (~99 kDa) or anti-N prom1 (~95 kDa) overnight. Blots were then incubated with  
224 IRDye800CW- or IRDye700CW-conjugated secondary antibodies (1:10,000; Rockland,  
225 Gilbertsville, PA) for 3 hrs and analyzed on a LI-COR Odyssey imager (Li-Cor, Lincoln, NE,  
226 USA).

227

228 Electroretinography

229 Electroretinograms (ERGs) were recorded as previously described using electrodes connected to  
230 a model 1800 AC amplifier and head stage (AM Systems, Sequim, WA) and an Espion Ganzfeld

231 stimulator (ColorDome) and recording unit (Diagnosys LLC, Lowell, MA) (22). Corneal  
232 recordings were made from a silver wire electrode set in a glass micropipette filled with 0.1x MMR  
233 and mounted into a micromanipulator. The combined reference and ground were a modified gold  
234 EEG electrode glued into a 60 mm petri dish. Tadpoles at Niewkoop and Faber stages 52-54 were  
235 anesthetized by exposure to 0.03% tricaine for 2 min and then mounted on their right side on the  
236 reference electrode using 2% low-melting point agarose infused with 0.01% tricaine. Scotopic  
237 ERGs were recorded in animals that had been dark-adapted overnight and prepared under dim red  
238 light; recorded stimuli were the average of 5 trials. Photopic ERGs were recorded in animals that  
239 had been exposed to a normal light cycle and prepared under regular lab lighting (350-500 lux);  
240 recorded stimuli were the average of 10 trials. All ERGs were recorded from the left eye, which  
241 was then fixed and processed for histology.

242

#### 243 Experimental Design & Statistical Analysis

244 Tadpole sex was not determined and phenotypic expression of mutations did not differ according  
245 to sex in frogs, so data from both sexes were pooled. The generation and number of animals used  
246 for each set of experiments are indicated in the results and in figure captions. Statistical analysis  
247 and graphing was performed using GraphPad Prism (V.6-8; San Diego, CA, USA). Western blot  
248 band density was quantified using FIJI (V 1.52p, Bethesda, Maryland, USA) and then unpaired,  
249 two-tailed t-tests were used to analyse differences between wildtype and mutant eyes. ERG  
250 waveforms were visualized in Excel (Microsoft, Redmond, WA) and analyzed by measuring the  
251 A-wave and B-wave peak amplitudes, plotting them, and then fitting the resulting curves using  
252 non-linear regression analysis. Genotype effects, light intensity effects, and interaction effects  
253 were analysed by two-way ANOVA with Sidak's post hoc test. Photopic latency in *cdhr1*-null

254 animals was analyzed by measuring the difference between peaks (*cdhr1*-null mutant minus  
255 wildtype) and then comparing the mean differences of all groups using a one-way ANOVA with  
256 Tukey post hoc test. Micrographs were processed using Adobe Photoshop (Creative Cloud 2019)  
257 and FIJI; any nonlinear adjustments in signal intensity are reported in the figure captions. Osmium  
258 peptering artifacts that obscured the underlying OS structure were digitally removed from some  
259 of the TEM micrographs. A preliminary report of some of our findings was presented previously  
260 in abstract form (Carr B, et al. IOVS 2019; 60 ARVO E-Abstract).

261

## 262 RESULTS

263 CRISPR/Cas9-mediated gene editing is effective for *prom1* and *cdhr1* in *X. laevis* embryos. The  
264 *prom1* gene identified on xenbase.org (xelaev18034674mg, XB-GENE-6460662, NCBI Gene ID:  
265 100316925 (*prom1.L*) corresponds to the *X. laevis* prominin-3 sequence, and is not expected to be  
266 expressed in high levels in the retina (23). The *prom1* sequence used in the experiments reported  
267 here – xelaev18005149m, NCBI Gene ID: 100316924 (*prom1-1*) – was found by utilizing the  
268 xenbase.org BLAST database. It corresponds to the *X. laevis* prominin-1 sequence reported by  
269 Han and Papermaster and is therefore expected to have high retinal expression. There is likely no  
270 functional *prom1* S chromosome gene, as only 6/27 exons were identified in mRNA, protein, and  
271 EST databases; regardless, we did design one of the sgRNAs tested to target both the L and S  
272 chromosomes. Three *prom1* sgRNAs – targeting exon 1 (L), 12 (L & S), or 21 (L) – were tested  
273 and all resulted in successful editing. Sanger chromatograms for embryos with successful  
274 CRISPR/Cas9 editing were degraded near the predicted cut site, representing the occurrence of  
275 random indels due to nonhomologous end joining (NHEJ). The exon 1-targeting sgRNA was  
276 chosen for subsequent experiments because it had the highest editing efficiency (64% of eGFP+

277 embryos) and the resultant phenotype from all sgRNAs was the same. Three *cdhr1* guides –  
278 targeting exon 1 (L & S), 7 (L & S), or 8 (L & S) – were tested and only the exon 7-targeting  
279 sgRNA was successful in editing both the L (88% of eGFP+ embryos) and the S (32% of eGFP+  
280 embryos) chromosomes. Reduction of *prom1* and *cdhr1* protein immunoreactivity was verified  
281 with Western blot and immunohistochemistry (*prom1*-null F0 & F1 and *cdhr1*-null F3, n = 10-12;  
282 Fig. 1). Genotypes for animals used in subsequent experiments were as follows: *prom1*-null F0:  
283 various random indels; *prom1*-null F1: L: homozygous 5 bp deletion, homozygous 6 bp deletion,  
284 or heterozygous 5 bp deletion + 6 bp deletion; *cdhr1*-null F2-3: L: homozygous 27 bp deletion,  
285 homozygous 10 bp deletion, or heterozygous 27 bp deletion + 10 bp deletion and S: homozygous  
286 4 bp deletion; *prom1* + *cdhr1*-null: F0 various random indels.

287

288 Loss of *prom1* results in dysmorphic rods and severely dysmorphic cones

289 We found that *prom1* protein is expressed in *X. laevis* retina in the basal ROS and in the COS  
290 opposite the disc rim protein peripherin-2 (*prph-2*), similar to results reported previously (10). We  
291 also found *prom1*-positive puncta scattered throughout the plasma membrane at the surface of the  
292 ROS, but not inside of the ROS (Fig. 1a, black arrowheads). CRISPR-mediated *prom1* gene  
293 knockdown significantly reduced retinal *prom1* immunoreactivity in Western blot and  
294 immunohistochemistry, and resulted in dysmorphic photoreceptor OS (F0-F1, n = 10-26; Figs. 1,  
295 2). In contrast to the uniform cylindrical wildtype ROS, *prom1*-null ROS were shortened and  
296 amorphous, with diameters changing markedly over short distances; these constrictions and bulges  
297 were comprised of overgrown or oddly grown OS disc membranes that were bent, folded, and  
298 formed circular whorls. There were also instances of overgrown loops of membranes that  
299 continued upwards alongside the ROS. The presence of *prph-2* and lack of Lucifer yellow staining

300 throughout the ROS indicates that although the ROS disc membranes are overgrown, they develop  
301 rims and do not remain open to the extracellular space (F0, n = 26, Fig. 2a,b). COS in *prom1*-null  
302 mutants were elongated and fragmented, and were often closely associated with the ROS plasma  
303 membranes – appearing to adhere to the ROS in fragmented puncta or wrap around the ROS in  
304 cone opsin positive tendril-like structures or sheets (F0 & F1, n = 14-26, Fig. 2c, asterisks & white  
305 arrowheads). There was occasional mislocalization of cone opsin to the inner segment plasma  
306 membrane in F0 animals, which varied greatly from a single cone inner segment to all of the cone  
307 inner segments in a section (15/42 specimens examined, 14-42 dpf; Fig. 2c). Cone opsin inner  
308 segment localization was most commonly correlated with complete destruction of the COS,  
309 although not always. Cone opsin mislocalization to the inner segment was not found in F1 animals  
310 with dysmorphic photoreceptors from two different genetic backgrounds (n = 10). There was no  
311 observed mislocalization of *cdhr1* to the inner segment (F0 & F1, n = 14-26, Fig. 2a). Between 14  
312 dpf to 6 weeks post-fertilization, dysmorphic ROS continued to grow to near adult length, but  
313 retained the dysmorphic structure of constrictions and bulges throughout the ROS; there was still  
314 no inner segment localization of any of the retinal proteins investigated. As animals aged, there  
315 was an increase in the appearance of small deposits that stained heavily with Hoescht and were  
316 also autofluorescent; thus, they are likely of cellular origin such as accumulations of cellular debris  
317 or possibly dying RPE cells (Fig. 2a, white arrowheads). These deposits did not occur in wildtype  
318 animals.

319

320 When *prom1*-null retinas were examined using TEM, we found that ROS disc structural elements  
321 such as membrane laminations and hairpin rims were present and normal looking, even though the  
322 disc membranes themselves were highly disorganized. *Prom1*-null ROS disc membranes are

323 convoluted with adjacent layers that run in different directions, but they remain contained by the  
324 plasma membrane. Overall, local disc structure was well-preserved, but higher-order disc  
325 organization was dramatically disrupted. Frequently observed features were turns, folds, strings of  
326 membrane, and whorls, and there were also a few instances of penetration of disc membrane into  
327 the inner segment. In some ROS, the basal discs did not form hairpins; instead, they made a 90  
328 degree turn from horizontal to the vertical direction, and then continued upwards along the ROS  
329 (F0, n = 3, Fig. 3a). In contrast, we found that COS disc membranes were very difficult to visualize  
330 with TEM due to their tortuous morphology and fragmentation of the membranes as observed  
331 using light microscopy. Almost no recognizable COS structures were observed by TEM other than  
332 occasional loops of disc membrane in close proximity to the COS. Most commonly, masses of  
333 completely disordered thin membranes above the inner segment were seen (F0, n = 3, Fig. 3b).

334

335 Loss of *prom1* results in impaired cone function

336 The impact of *prom1*-null mutations on the scotopic ERG in 6 week old tadpoles was minimal. At  
337 the lowest light intensities, the scotopic A-wave amplitude was reduced compared to wildtype  
338 controls (a 75-78% reduction in response amplitude at 2.5-25 cd/m<sup>2</sup>; simple main genotype effect,  
339  $F(1, 78) = 13.13, p = 0.0005$ ), but the difference between *prom1*-null and wildtype A-wave  
340 amplitudes decreased as light intensities increased (a 44-53% reduction at 250-750 cd/m<sup>2</sup>, no  
341 difference at 1250-2500 cd/m<sup>2</sup>). *Prom1*-null scotopic B-wave amplitudes were not significantly  
342 different from wildtype controls, and no change in the shape of the scotopic ERG waveform was  
343 observed (n = 7; Fig. 4).

344



345 The impact of *prom1*-null mutation on the photopic ERG of 6 week old tadpoles was significant.  
346 *Prom1*-null photopic A- and B- wave amplitudes were significantly reduced at higher light  
347 intensities relative to wildtype controls. For the photopic A-wave (interaction effect,  $F(5, 72) =$   
348  $3.435, p = 0.0077$ ), there was no difference at 0.25-7.5  $\text{cd/m}^2$  and a 30-50% reduction at 25 and 75  
349  $\text{cd/m}^2$ ; (simple main genotype effect,  $F(1, 72) = 4.686, p = 0.0337$ ). For the photopic B-wave  
350 (interaction effect  $F(5, 72) = 6.290, p < 0.0001$ ), there was no difference from 0.25-2.5  $\text{cd/m}^2$ , a  
351 46% reduction at 7.5  $\text{cd/m}^2$ , and a 64-66% reduction at 25-75  $\text{cd/m}^2$  (simple main genotype effect,  
352  $F(1, 72) = 34.29, p < 0.0001$ ). *Prom1*-null cone response to 5 Hz photopic flicker was also reduced  
353 relative to wildtype at higher light intensities (interaction effect,  $F(5, 72) = 4.179, p = 0.0022$ ).  
354 There was no difference from 0.25-0.75  $\text{cd/m}^2$ , a 58% reduction at 2.5-7.5  $\text{cd/m}^2$ , and a 50-54%  
355 reduction at 25-75  $\text{cd/m}^2$  (simple main genotype effect,  $F(1, 72) = 34.84, p < 0.001$ ) ( $F_0, n = 7$ ,  
356 Fig. 5).

357

358 Loss of *cdhr1* results in OS disc orientation and growth defects

359 We determined that *X. laevis* *cdhr1* protein is expressed at the basal ROS and in the ROS plasma  
360 membrane. *Cdhr1*-null animals lost *cdhr1* immunoreactivity in the ROS, but some signal remained  
361 in the COS and possible RPE microvilli ( $F_2-3, n = 7-11$ , Fig. 1b). This immunoreactivity is likely  
362 not *cdhr1*-specific; Western blots demonstrated loss of one strong band of the expected size in  
363 *cdhr1*-null animals, but also showed the presence of several non-specific bands ( $F_3, n = 12$ , Fig.  
364 1b). *Cdhr1*-null mutants did not have severely dysmorphic photoreceptor OS, and differences  
365 between mutants and wildtype animals were not easily detectable by regular confocal microscopy.  
366 Possible subtle changes could be a narrowing and lengthening of the ROS and some COS that  
367 were shortened or collapsed at the tips. The expression and localization of rhodopsin, cone opsin,

368 prom1, and prph-2 were all normal. Using super-resolution microscopy, we observed that some  
369 rod photoreceptors (~20 %) had areas of membrane overgrowth that extended from the basal ROS  
370 upwards, alongside the outside of the regularly-ordered disc membranes and incisures. There was  
371 also visible “pock-marking” or holes in some of the basal ROS. There was no penetration of  
372 Lucifer yellow into the ROS, however, indicating that although there is abnormal membrane  
373 growth, the disc membranes are sealed off from the extracellular space. (F2-3, n = 5-11, Fig. 6b).

374

375 Ultrastructural analysis by TEM confirmed disc membrane orientation and growth defects in the  
376 ROS. The principal defect observed was that some disc membranes (~30%) were oriented  
377 vertically within the ROS plasma membrane; these defects occurred both as long, thin sections of  
378 vertically-oriented disc membranes and shorter “stacked” thicker sections of vertical membranes  
379 comprised of short pieces of disc membrane and many rim structures. Rim structures and  
380 “bubbles” of membrane – which likely correspond to the “pock-marking” seen in the super-  
381 resolution images – were almost always present at the point at which disc orientation was altered.  
382 Horizontally- and vertically-oriented ROS membrane discs had normal lamination and the discs  
383 remained tightly packed into the ROS plasma membrane. COS discs appeared relatively free of  
384 defects, although some COS (~10%) had a “frayed” appearance, in which disc lamella were not  
385 uniformly registered, suggesting over- or under-growth of the disc membranes at somewhat  
386 regularly-spaced intervals (F0-F1, 14-49 dpf, n = 5; Fig. 7).

387

388 Loss of *cdhr1* may affect photoreceptor signalling kinetics

389 The shape and scale of the scotopic ERG from six week old *cdhr1*-null tadpoles was not  
390 significantly different from wildtype animals in regards to the A- or B-wave amplitude, but the B-

391 wave tended to return to baseline more quickly in *cdhr1*-null animals (F3, n = 8, Fig. 8). There  
392 was no statistically significant effect on photopic ERG amplitudes, although there was a trend  
393 towards a slightly larger B-wave response and a small increase in latency for B-wave onset; this  
394 latency was not statistically significant for any condition other than 5 Hz flicker at 25 cd/m<sup>2</sup> (one-  
395 way ANOVA, F (5, 24) = 6.625, P = 0.0005) (F3, n = 10, Fig. 8).

396

397 Combination of *prom1* + *cdhr1* knockdown does not result in a more severe phenotype or more  
398 severe functional impairment than *prom1* knockdown alone.

399 Photoreceptors with both *prom1* and *cdhr1* gene knockdown were not significantly more  
400 dysmorphic or prone to degeneration than *prom1*-null animals. The effects on OS structure and  
401 protein localization were not distinguishable from *prom1*-null retinas for both light microscopy  
402 and TEM (F0, n = 3-14; Fig. 10, Fig. 11). Older double-null animals also had the small Hoechst-  
403 stained autofluorescent deposits in the OS layer (Fig. 10).

404

405 The impact of *prom1* + *cdhr1*-null mutations on photoreceptor function was similar to that of  
406 *prom1*-null mutations. Double-null mutants were less sensitive to lower and moderate intensity  
407 scotopic stimuli but the difference decreased at higher intensity stimuli (scotopic A wave: no  
408 difference in response amplitude from baseline at 2.5-25 cd/m<sup>2</sup>, a 76% reduction at 250 cd/m<sup>2</sup>, no  
409 difference at 750-2500 cd/m<sup>2</sup>; simple main genotype effect, F (1, 35) = 6.511, p = 0.0152). There  
410 was no significant difference in scotopic B-wave amplitude or change in the shape of the scotopic  
411 ERG waveform (n = 3-5; Fig. 12).

412

413 Cone function of *prom1* + *cdhr1*-null mutants was impaired compared to WT animals, and the  
414 effects were similar to those of *prom1*-null mutants; the photopic A-wave response to increasing  
415 white light intensities was reduced. The A-wave (no difference from 0.25-7.5 cd/m<sup>2</sup>, a 42%  
416 reduction at 25 cd/m<sup>2</sup>, and a 77% reduction at 75 cd/m<sup>2</sup>; simple main genotype effect, F (1, 42) =  
417 7.861, p = 0.0076) and the B-wave response curves were flattened (interaction effect, F (5, 42) =  
418 12.93, p < 0.0001; no difference from 0.25-2.5 cd/m<sup>2</sup>, a 44% reduction at 7.5 cd/m<sup>2</sup>, a 56%  
419 reduction at 25 cd/m<sup>2</sup>, and a 54% reduction at 75 cd/m<sup>2</sup>; simple main genotype effect, F (1, 42) =  
420 62.69, p < 0.0001). The response to photopic flicker (5 Hz) of *prom1* + *cdhr1*-null animals was  
421 also reduced (no difference from 0.25-2.5 cd/m<sup>2</sup>, a 50% reduction at 7.5 cd/m<sup>2</sup>, a 37% reduction  
422 at 25 cd/m<sup>2</sup>, and a 33% reduction at 75 cd/m<sup>2</sup> (interaction effect, F (5, 42) = 3.641, p = 0.0080;  
423 simple main genotype effect, F (1, 42) = 27.67, p < 0.0001) (F0, n = 4-5, Fig. 13).

424

## 425 DISCUSSION

426 The central finding of this study is that neither *prom1* nor *cdhr1* are necessary for photoreceptor  
427 outer segment disc membrane evagination, disc fusion, or the maintenance of the spacing of disc  
428 membrane lamellae. Our results suggest that *prom1* and *cdhr1* have distinct roles in regulating  
429 different aspects of nascent outer segment disc membrane size and organization. Prom1 may  
430 regulate disc size, by aligning and reinforcing interactions between the leading edges, while *cdhr1*  
431 may regulate disc membrane organization by helping to keep the discs horizontal before fusion  
432 occurs. Different roles for *prom1* and *cdhr1* in OS disc morphogenesis is supported by the  
433 observation that phenotypes caused by *prom1*-null mutations are significantly more severe than  
434 those resulting from *cdhr1*-null mutations and there is no mislocalization to the inner segment of  
435 *prom1* in *cdhr1*-null animals or *cdhr1* in *prom1*-null animals. A secondary important finding of

436 this study is that the retinas of *prom1*-, *cdhr1*-, and double-null *X. laevis* do not degenerate quickly.  
437 The maintenance and growth of ROS, the lack of any OS protein mislocalization to the inner  
438 segment, the preservation of photoreceptor function, and the increasing appearance of  
439 autofluorescent deposits in the OS layer of older *prom1*-null animals suggests that retinal  
440 degeneration caused by these mutations may be due to secondary toxic retinal effects – e.g., RPE  
441 toxicity or accumulation of cellular waste products – and not due to direct effects of these  
442 mutations on OS structure or the improper trafficking of OS proteins. This is an important finding,  
443 as it may not be critical to prevent the dysmorphic photoreceptors caused by *prom1*-null mutations  
444 to preserve vision; therapies could instead be targeted to prevent the secondary events that  
445 ultimately cause cell death.

446

447 The effects of *prom1*-null mutations on photoreceptor structure are severe. The presence of  
448 convoluted overgrown membranes indicates that *prom1* likely plays a role in regulating the size  
449 of OS membrane discs, possibly by controlling the amount of membrane that is added before  
450 disc fusion occurs or by aligning and reinforcing interactions between the leading edges of the  
451 discs as they elongate. Nascent disc evagination and disc fusion still occurs in *prom1*-null  
452 mutants, as evidenced by the lack of photoreceptor death or degeneration of the OS and by the  
453 presence of hairpins and the lack of Lucifer yellow staining within the ROS. Recent studies have  
454 suggested that *prom1* may be involved in cytoskeletal remodelling, specifically by interacting  
455 with phosphoinositide 3-kinase and the Arp2/3 complex (16), and a conditional knockdown of  
456 the Arp2/3 complex in mice ROS results in abnormal OS structure with a similar phenotype to  
457 that of *prom1*-null *X. laevis*; OS membranes form knob-like protrusions made up of whorls of  
458 overgrown disc membranes (24). Overgrowth of disc membranes also occurs when eyecups are

459 treated with cytochalasin D, a mycotoxin that inhibits actin polymerization (25). At the  
460 molecular level, *prom1* has been reported to associate with actin and to regulate membrane  
461 localization and retention of cholesterol (18, 26). Cholesterol reinforces positive membrane  
462 curvature, such as the leading edges of evaginating discs, and loss of membrane rigidity in the  
463 leading edges of the COS lamella could explain the elongated and fragmented appearance of  
464 *prom1*-null *X. laevis* cones; unlike ROS, the COS do not have the extra structural support of full  
465 disc fusion or a surrounding plasma membrane.

466  
467 The survival of dysmorphic photoreceptors in *X. laevis* supports that *prom1* is not required for  
468 biosynthesis of OS discs or trafficking of opsins to the OS. There is no mislocalization of key OS  
469 proteins such as rod opsin, cone opsins, or *prph-2* to the inner segment, and *prom1*-null *X. laevis*  
470 lack the severe retinal degeneration frequently associated with defects in ciliary or trafficking  
471 components (5). Instead, the earlier and severe retinal degeneration reported in mice and  
472 zebrafish could be due to the shorter lifespans of these animals compared to *X. laevis* (1.5-3.5 yrs  
473 vs. 15-30 yrs), and the retinal degeneration reported could be compounded by age-related retinal  
474 degenerative components instead of being directly caused by the loss of *prom1*. Cone opsin  
475 mislocalization occurred only in a small subset of *prom1*-null *X. laevis*, unlike previous reports  
476 in *prom1*<sup>-/-</sup> and *prom1*<sup>R373C</sup> mice (11, 18), and our results indicate that this mislocalization is  
477 usually the result of complete destruction of the COS. The lack of early and severe retinal  
478 degeneration in *prom1*-null *X. laevis* supports the hypothesis that disruption of OS disc  
479 morphogenesis is not the cause of photoreceptor death, but that an indirect secondary effect  
480 could be responsible instead. In support of this, there are increasing numbers of small, heavily  
481 Hoechst-stained autofluorescent deposits in the OS layer of 6 week old *prom1*-null *X. laevis*. An

482 increase in lipofuscin-like deposits in *prom1*<sup>R373C</sup> mice has also been reported (18). Clinically,  
483 some *prom1* mutant retinal diseases resemble Stargardt disease (6, 7, 27), which is also caused  
484 by secondary toxic effects – i.e., the build-up of bisretinoid A2PE (lipofuscins) due to the lack of  
485 ABCA4 kills the RPE, leading to subsequent photoreceptor death (28, 29). It should be noted,  
486 however, that *prom1*-null and *prom1*<sup>R373C</sup> patients lack the retinal hyperfluorescence associated  
487 with ABCA4-associated Stargardt disease.

488

489 The *cdhr1*-null phenotype in *X. laevis* is less severe than the effects of *prom1*-null mutations and  
490 the *cdhr1*-null phenotype reported in mouse. OS disorganization is limited to changes in disc  
491 membrane orientation, poor disc stacking, and occasional membrane whorls due to oversized disc  
492 membranes. There is no mislocalization of OS proteins such as rhodopsin, cone opsins, prph-2, or  
493 *prom1* and the lack of Lucifer yellow dye penetration into the overgrown ROS membranes  
494 indicates that they are sealed off from the extracellular space. The subtle changes in ERG response  
495 suggest that all components required for phototransduction are present and functional. *X. laevis*  
496 photoreceptors appear largely unaffected by the loss of *cdhr1*, even though mice were reported to  
497 experience up to 50% loss of outer nuclear layer density by 6 months of age (8). This difference  
498 in reported photoreceptor death between species could be the result of differences in *cdhr1* protein  
499 cleavage and localization in the ROS. In mice, *cdhr1* is localized only to the basal ROS, where it  
500 is cleaved into a soluble N-terminus and a membrane-embedded C-terminus (19). It was  
501 hypothesized that this cleavage represents an irreversible step in rod OS morphogenesis, such as  
502 during membrane fusion when nascent open discs are closed off and enclosed within the ROS  
503 plasma membrane. *Xenopus* discs appear to require neither *cdhr1* nor *cdhr1* cleavage for  
504 membrane fusion however – N-terminal immunoreactivity is present in the basal ROS as well as

505 throughout the ROS plasma membrane in wildtype animals and hairpins are detectable using TEM  
506 in *cdhr1*-null mutants – suggesting that this process is not integral to fusion of the leading edges.  
507 It has also been suggested that *cdhr1* may act as a tether between the leading edge of nascent ROS  
508 discs and the inner segment, and that it could guide OS disc growth until the disc has reached the  
509 correct size, after which the tether is severed (2). Our data support this hypothesis over the cleavage  
510 hypothesis. *X. laevis* have calyceal processes made up of F-actin fibres that form a cage-like  
511 structure around the base of the rod and cone OS, which mice lack (30). Possibly, the presence of  
512 calyceal processes could lessen the impact of the loss of *cdhr1* if its function is to tether nascent  
513 discs in alignment, as they could provide additional structural support and guidance for nascent  
514 disc membranes as they elongate.

515

516 Our study does not support the existence of a *prom1*-*cdhr1* protein complex that performs a  
517 single, shared role in OS disc morphogenesis as previously hypothesized (18). If this were true,  
518 then it would be expected that *prom1*-null and *cdhr1*-null mutations should affect OS  
519 morphology similarly. Instead, the *prom1*-null phenotype is significantly more severe than  
520 *cdhr1*-null phenotype and there is no mislocalization of *prom1* in *cdhr1*-null animals or *cdhr1* in  
521 *prom1*-null animals. These proteins may still interact, but their function is not dependent on the  
522 presence of the other protein. Double-null mutants do not have a significantly different  
523 phenotype than *prom1*-null mutants, which provides further evidence against a genetic or protein  
524 interaction. If a relationship existed, we would expect that double-null animals would have either  
525 a significantly more severe phenotype (synergy) or a mitigated phenotype, which may occur  
526 when gene products operate in series within the same pathway (31).

527



528 In summary, the results reported in this study have provided significant new insights into the  
529 function of *prom1* and *cdhr1* proteins in photoreceptor outer segment morphogenesis and the  
530 pathogenesis of *prom1*-null mutations in human disease. Our data support a role for *prom1* in the  
531 regulation of nascent disc size and structural support for the OS and a role of *cdhr1* in disc  
532 membrane tethering and organization. Our study also shows definitively that these proteins are  
533 not required for outer segment disc evagination, the formation of hairpins, or disc fusion.  
534 Furthermore, we are the first to report that *prom1*-null mutations may cause retinal degeneration  
535 by secondary effects instead of direct effects on photoreceptor OS morphogenesis. This new  
536 insight could lead to a paradigm shift in the development of therapies for human patients, as it  
537 may not be necessary to rebuild the photoreceptors to preserve vision; therapies could instead be  
538 targeted to preventing the secondary events that ultimately cause cell death. This is an exciting  
539 subject of future investigation.

540

#### 541 REFERENCES

- 542 1. Ding, J. D., Salinas, R. Y., and Arshavsky, V. Y. (2015) Discs of mammalian rod  
543 photoreceptors form through the membrane evagination mechanism. *J Cell Biol.* **211**,  
544 495–502
- 545 2. Burgoyne, T., Meschede, I. P., Burden, J. J., Bailly, M., Seabra, M. C., and Futter, C. E.  
546 (2015) Rod disc renewal occurs by evagination of the ciliary plasma membrane that  
547 makes cadherin-based contacts with the inner segment. *Proc Natl Acad Sci U S A.* **112**,  
548 15922–15927
- 549 3. Volland, S., Hughes, L. C., Kong, C., Burgess, B. L., Linberg, K. A., Luna, G., Zhou, Z.

- 550 H., Fisher, S. K., and Williams, D. S. (2015) Three-dimensional organization of nascent  
551 rod outer segment disk membranes. *Proc Natl Acad Sci U S A.* **112**, 14870–14875
- 552 4. Steinberg, R. H., Fisher, S. K., and Anderson, D. H. (1980) Disc morphogenesis in  
553 vertebrate photoreceptors. *J Comp Neurol.* **190**, 501–508
- 554 5. Goldberg, A. F. X., Moritz, O. L., and Williams, D. S. (2016) Molecular basis for  
555 photoreceptor outer segment architecture. *Prog. Retin. Eye Res.* **55**, 52–81
- 556 6. Kniazeva, M., Chiang, M. F., Morgan, B., Anduze, A. L., Zack, D. J., Han, M., and  
557 Zhang, K. (1999) A new locus for autosomal dominant Stargardt-like disease maps to  
558 chromosome 4. *Am. J. Hum. Genet.* **64**, 1394–1399
- 559 7. Michaelides, M., Gaillard, M. C., Escher, P., Tiab, L., Bedell, M., Borruat, F. X.,  
560 Barthelmes, D., Carmona, R., Zhang, K., White, E., McClements, M., Robson, A. G.,  
561 Holder, G. E., Bradshaw, K., Hunt, D. M., Webster, A. R., Moore, A. T., Schorderet, D.  
562 F., and Munier, F. L. (2010) The PROM1 mutation p.R373C causes an autosomal  
563 dominant bull’s eye maculopathy associated with rod, rod-cone, and macular dystrophy.  
564 *Invest Ophthalmol Vis Sci.* **51**, 4771–4780
- 565 8. Rattner, A., Smallwood, P. M., Williams, J., Cooke, C., Savchenko, A., Lyubarsky, A.,  
566 Pugh, E. N., and Nathans, J. (2001) A photoreceptor-specific cadherin is essential for the  
567 structural integrity of the outer segment and for photoreceptor survival. *Neuron.* **32**, 775–  
568 786
- 569 9. Gurudev, N., Florek, M., Corbeil, D., and Knust, E. (2013) Prominent role of prominin in  
570 the retina. *Adv Exp Med Biol.* **777**, 55–71

- 571 10. Han, Z., Anderson, D. W., and Papermaster, D. S. (2012) Prominin-1 localizes to the open  
572 rims of outer segment lamellae in *Xenopus laevis* rod and cone photoreceptors. *Invest*  
573 *Ophthalmol Vis Sci.* **53**, 361–373
- 574 11. Zacchigna, S., Oh, H., Wilsch-Brauninger, M., Missol-Kolka, E., Jaszai, J., Jansen, S.,  
575 Tanimoto, N., Tonagel, F., Seeliger, M., Huttner, W. B., Corbeil, D., Dewerchin, M.,  
576 Vinckier, S., Moons, L., and Carmeliet, P. (2009) Loss of the cholesterol-binding protein  
577 prominin-1/CD133 causes disk dysmorphogenesis and photoreceptor degeneration. *J*  
578 *Neurosci.* **29**, 2297–2308
- 579 12. Nie, J., Mahato, S., Mustill, W., Tipping, C., Bhattacharya, S. S., and Zelhof, A. C. (2012)  
580 Cross species analysis of Prominin reveals a conserved cellular role in invertebrate and  
581 vertebrate photoreceptor cells. *Dev Biol.* **371**, 312–320
- 582 13. Marzesco, A. M., Janich, P., Wilsch-Brauninger, M., Dubreuil, V., Langenfeld, K.,  
583 Corbeil, D., and Huttner, W. B. (2005) Release of extracellular membrane particles  
584 carrying the stem cell marker prominin-1 (CD133) from neural progenitors and other  
585 epithelial cells. *J Cell Sci.* **118**, 2849–2858
- 586 14. Singer, D., Thamm, K., Zhuang, H., Karbanová, J., Gao, Y., Walker, J. V., Jin, H., Wu,  
587 X., Coveney, C. R., Marangoni, P., Lu, D., Grayson, P. R. C., Gulsen, T., Liu, K. J., Ardu,  
588 S., Wann, A. K., Luo, S., Zambon, A. C., Jetten, A. M., Tredwin, C., Klein, O. D.,  
589 Attanasio, M., Carmeliet, P., Huttner, W. B., Corbeil, D., and Hu, B. (2019) Prominin-1  
590 controls stem cell activation by orchestrating ciliary dynamics. *EMBO J.*  
591 10.15252/emj.201899845
- 592 15. Corbeil, D., Marzesco, A. M., Wilsch-Brauninger, M., and Huttner, W. B. (2010) The

- 593 intriguing links between prominin-1 (CD133), cholesterol-based membrane  
594 microdomains, remodeling of apical plasma membrane protrusions, extracellular  
595 membrane particles, and (neuro)epithelial cell differentiation. *FEBS Lett.* **584**, 1659–1664
- 596 16. Thamm, K., Šimaitė, D., Karbanová, J., Bermúdez, V., Reichert, D., Morgenstern, A.,  
597 Bornhäuser, M., Huttner, W. B., Wilsch-Bräuninger, M., and Corbeil, D. (2019)  
598 Prominin-1 (CD133) modulates the architecture and dynamics of microvilli. *Traffic.* **20**,  
599 39–60
- 600 17. Dellett, M., Sasai, N., Nishide, K., Becker, S., Papadaki, V., Limb, G. A., Moore, A. T.,  
601 Kondo, T., and Ohnuma, S. (2014) Genetic background and light-dependent progression  
602 of photoreceptor cell degeneration in Prominin-1 knockout mice. *Invest Ophthalmol Vis*  
603 *Sci.* **56**, 164–176
- 604 18. Yang, Z., Chen, Y., Lillo, C., Chien, J., Yu, Z., Michaelides, M., Klein, M., Howes, K. A.,  
605 Li, Y., Kaminoh, Y., Chen, H., Zhao, C., Al-Sheikh, Y. T., Karan, G., Corbeil, D., Escher,  
606 P., Kamaya, S., Li, C., Johnson, S., Frederick, J. M., Zhao, Y., Wang, C., Cameron, D. J.,  
607 Huttner, W. B., Schorderet, D. F., Munier, F. L., Moore, A. T., Birch, D. G., Baehr, W.,  
608 Hunt, D. M., Williams, D. S., and Zhang, K. (2008) Mutant prominin 1 found in patients  
609 with macular degeneration disrupts photoreceptor disk morphogenesis in mice. *J Clin*  
610 *Invest.* **118**, 2908–2916
- 611 19. Rattner, A., Chen, J., and Nathans, J. (2004) Proteolytic shedding of the extracellular  
612 domain of photoreceptor cadherin. Implications for outer segment assembly. *J Biol Chem.*  
613 **279**, 42202–42210
- 614 20. Feehan, J. M., Chiu, C. N., Stanar, P., Tam, B. M., Ahmed, S. N., and Moritz, O. L.

- 615 (2017) Modeling Dominant and Recessive Forms of Retinitis Pigmentosa by Editing  
616 Three Rhodopsin-Encoding Genes in *Xenopus Laevis* Using Crispr/Cas9. *Sci Rep.* **7**, 6920
- 617 21. Tam, B. M., Yang, L. L., Bogeia, T. H., Ross, B., Martens, G., and Moritz, O. L. (2015)  
618 Preparation of *Xenopus laevis* retinal cryosections for electron microscopy. *Exp Eye Res.*  
619 **136**, 86–90
- 620 22. Vent-Schmidt, R. Y. J., Wen, R. H., Zong, Z., Chiu, C. N., Tam, B. M., May, C. G., and  
621 Moritz, O. L. (2017) Opposing Effects of Valproic Acid Treatment Mediated by Histone  
622 Deacetylase Inhibitor Activity in Four Transgenic *X. laevis* Models of Retinitis  
623 Pigmentosa. *J Neurosci.* **37**, 1039–1054
- 624 23. Han, Z., and Papermaster, D. S. (2011) Identification of three prominin homologs and  
625 characterization of their messenger RNA expression in *Xenopus laevis* tissues. *Mol Vis.*  
626 **17**, 1381–1396
- 627 24. Spencer, W. J., Lewis, T. R., Phan, S., Cady, M. A., Serebrovskaya, E. O., Schneider, N.  
628 F., Kim, K. Y., Cameron, L. A., Skiba, N. P., Ellisman, M. H., and Arshavsky, V. Y.  
629 (2019) Photoreceptor disc membranes are formed through an Arp2/3-dependent  
630 lamellipodium-like mechanism. *Proc. Natl. Acad. Sci. U. S. A.* **116**, 27043–27052
- 631 25. Williams, D. S., Linberg, K. A., Vaughan, D. K., Fariss, R. N., and Fisher, S. K. (1988)  
632 Disruption of microfilament organization and deregulation of disk membrane  
633 morphogenesis by cytochalasin D in rod and cone photoreceptors. *J Comp Neurol.* **272**,  
634 161–176
- 635 26. Röper, K., Corbeil, D., and Huttner, W. B. (2000) Retention of prominin in microvilli

- 636 reveals distinct cholesterol-based lipid micro-domains in the apical plasma membrane. *Nat*  
637 *Cell Biol.* **2**, 582–592
- 638 27. Lee, W., Paavo, M., Zernant, J., Stong, N., Laurente, Z., Bearely, S., Nagasaki, T., Tsang,  
639 S. H., Goldstein, D. B., and Allikmets, R. (2019) Modification of the PROM1 disease  
640 phenotype by a mutation in ABCA4. *Ophthalmic Genet.* **40**, 369–375
- 641 28. Sparrow, J. R., Gregory-Roberts, E., Yamamoto, K., Blonska, A., Ghosh, S. K., Ueda, K.,  
642 and Zhou, J. (2012) The bisretinoids of retinal pigment epithelium. *Prog. Retin. Eye Res.*  
643 **31**, 121–135
- 644 29. Tanna, P., Strauss, R. W., Fujinami, K., and Michaelides, M. (2017) Stargardt disease:  
645 Clinical features, molecular genetics, animal models and therapeutic options. *Br. J.*  
646 *Ophthalmol.* **101**, 25–30
- 647 30. Sahly, I., Dufour, E., Schietroma, C., Michel, V., Bahloul, A., Perfettini, I., Pepermans, E.,  
648 Estivalet, A., Carette, D., Aghaie, A., Ebermann, I., Lelli, A., Iribarne, M., Hardelin, J. P.,  
649 Weil, D., Sahel, J. A., El-Amraoui, A., and Petit, C. (2012) Localization of usher 1  
650 proteins to the photoreceptor calyceal processes, which are absent from mice. *J. Cell Biol.*  
651 **199**, 381–399
- 652 31. Mani, R., St. Onge, R. P., Hartman IV, J. L., Giaever, G., and Roth, F. P. (2008) Defining  
653 genetic interaction. *Proc. Natl. Acad. Sci. U. S. A.* **105**, 3461–3466

654

#### 655 ABBREVIATIONS

656 OS, outer segment; ROS, rod outer segment; COS, cone outer segment; prom1, prominin-1;

657 cdhr1, cadherin-related family member 1 (photoreceptor cadherin); ERG, electroretinography;  
658 RPE, retinal pigment epithelium; WT, wildtype; WGA, wheat germ agglutinin; sgRNA, single-  
659 guide RNA; TEM, transmission electron microscopy.





Figure 1. Comparison of wildtype animal immunoreactivity for *prom1* and *cdhr1* proteins to *prom1*-null animals (a) and *cdhr1*-null animals (b). (a i) In wildtype animals, *prom1* is localized to the base of the ROS (white arrow), small puncta on the outside of the ROS (black arrowheads), and along one edge of the COS (white arrowheads). (a ii,iii) *Prom1* immunoreactivity is lost in *prom1*-null retinas and ROS/COS are dysmorphic (F1, n = 14). (a iv) Western blot for *prom1*-null F0 animals demonstrates a significant reduction in *prom1* protein immunoreactivity compared to wildtype (n = 10-11). One animal showed successful editing by Sanger sequencing but had a smaller reduction in *prom1* immunoreactivity than the others (‡). (b i) In wildtype animals, *cdhr1* protein is localized to a band at the base of the ROS (white arrowhead) and within the ROS plasma membrane (black arrowhead). (b ii,iii) ROS *cdhr1* immunoreactivity is lost in *cdhr1*-null animals, but signal remains in the cone outer and inner segments and in presumptive RPE microvilli (F2, n = 11). (b iv) Western blot for *cdhr1*-null animals shows a complete reduction in *cdhr1* protein immunoreactivity compared to wildtype in the band size that corresponds to the *cdhr1* protein ~95 kDa (n = 10-12). Channels: magenta = WGA, green/white = *prom1* (a) or *cdhr1* (b). *Abbreviations*: WT = wildtype.

Figure 2.

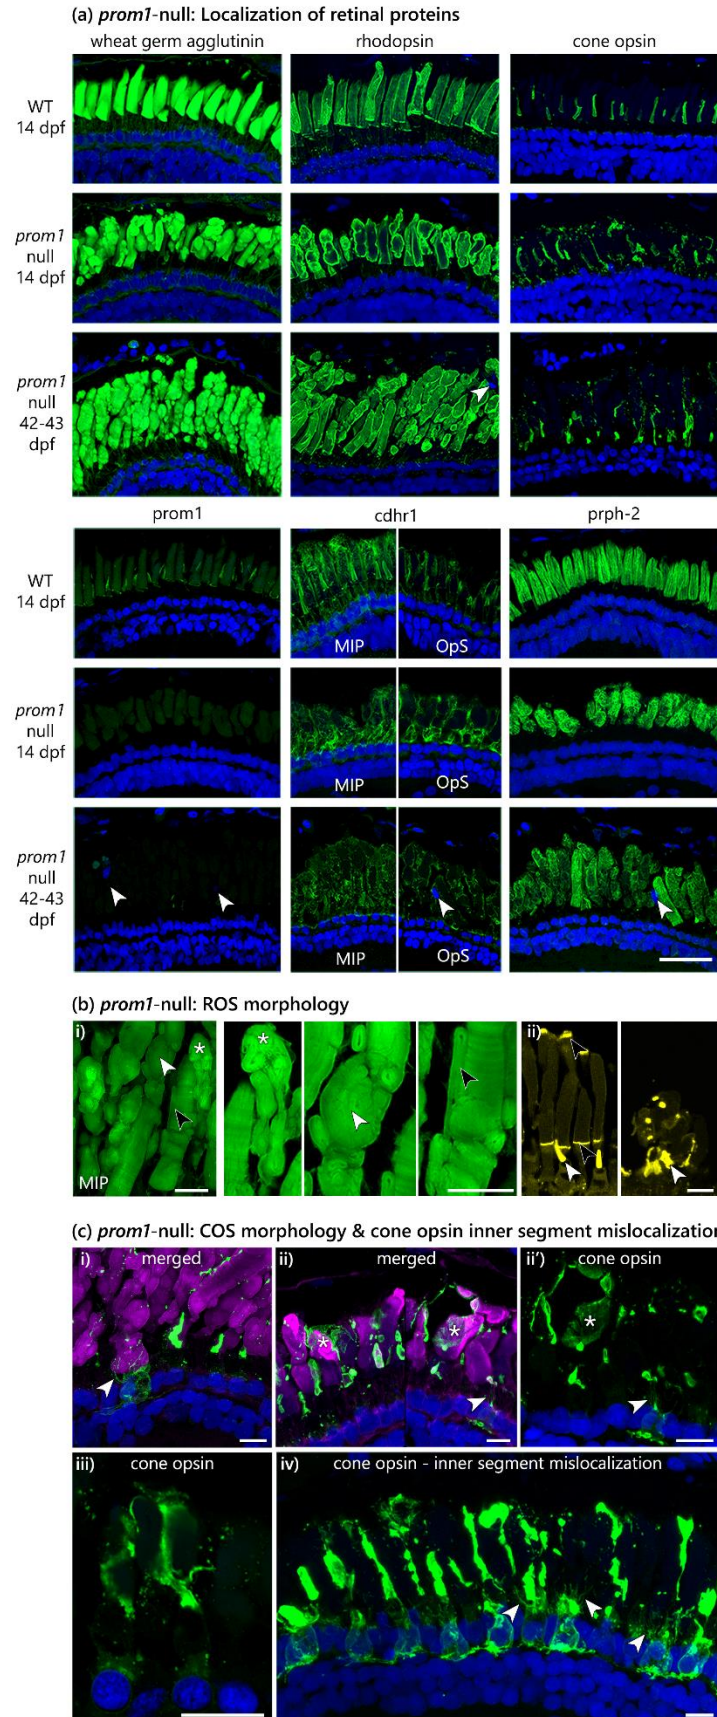

Figure 2. (a) Immunolabelling of various photoreceptor outer segment proteins in wildtype (14 dpf, top, n = 18) and F0 *prom1*-null (14 dpf, middle, n = 26; 42-43 dpf, bottom, n = 26) retinas. There is not mislocalization of any protein surveyed into the inner segment of the photoreceptors. As animals age, there is an increase in Hoechst-stained deposits in the outer segment layer (white arrowheads). *Channels*: green = protein of interest, blue = Hoechst. Scale bar = 50  $\mu$ m. (b) *Prom1*-null ROS morphology. (b i) Structures of interest are: folded strings of membranes (white asterisk), large and small membrane whorls (white arrowhead), and overgrown folded OS membrane that is oriented vertically along the outside of the ROS (black arrowhead). (b ii) Lucifer yellow staining verified that the overgrown and dysmorphic ROS discs of *prom1*-null mutants are not open to the extracellular space (left = WT, right = *prom1*-null). COS are indicated by the white arrowheads and nascent ROS discs that are open to the extracellular space are indicated by black arrowheads. *Channels*: green = WGA, yellow = Lucifer yellow. Scale bar = 10  $\mu$ m. (c) *Prom1*-null COS morphology. (c i-iv) Cone opsin positive membranes are fragmented and appear to be supported by neighbouring ROS. (c i, ii, iv) Tendrils of cone opsin-positive membrane are often seen wrapped around the base of adjacent ROS (white arrowheads) or draped over ROS in sheets (ii, white asterisks). (c iv) Cone opsin mislocalization to the inner segment occurs, but only in a small subset of animals (ca. 15% of retinas observed (F0), n = 41). *Channels*: green = cone opsin, blue = Hoechst, magenta = WGA. The green channel (cone opsin) was adjusted non-linearly in images c i, ii', and iv to show the tendrils and sheets of cone opsin positive membrane and cone opsin inner segment localization with greater intensity. Scale bar = 10  $\mu$ m. *Abbreviations*: COS = cone outer segment, dpf = days post-fertilization, MIP = maximum intensity projection, OpS = optical section (centre of stack), prph-2 = peripherin-2, ROS = rod outer segment, WT = wildtype.



Figure 3.

(a) *prom1*-null: ROS ultrastructure

i) Wildtype ROS

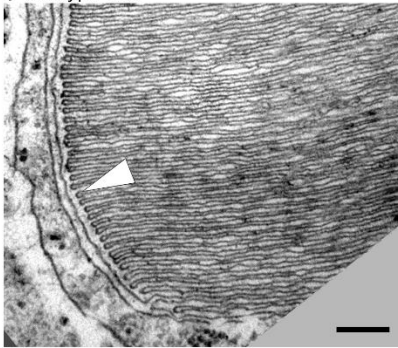

ii) *prom1*-null ROS

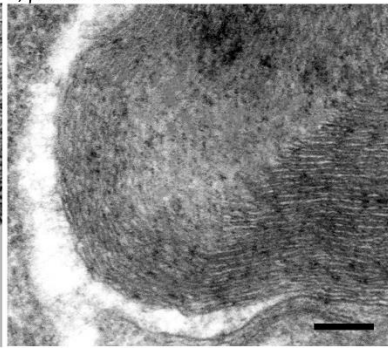

iii)

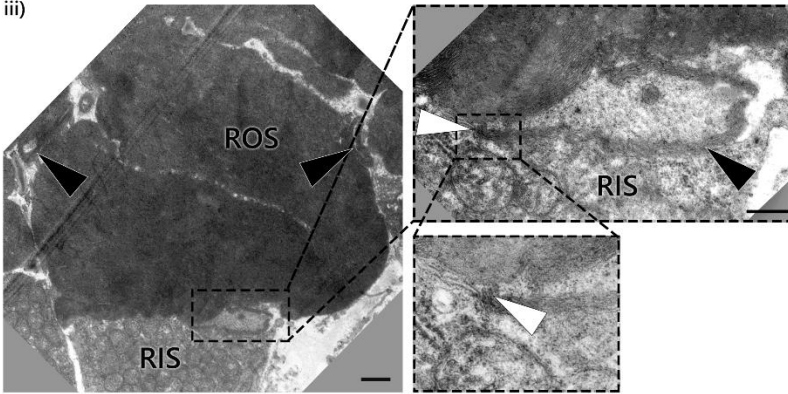

iv)

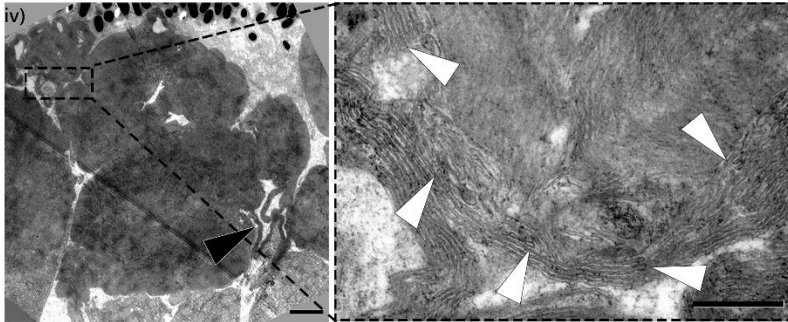

(b) *prom1*-null: COS ultrastructure

i) Wildtype COS

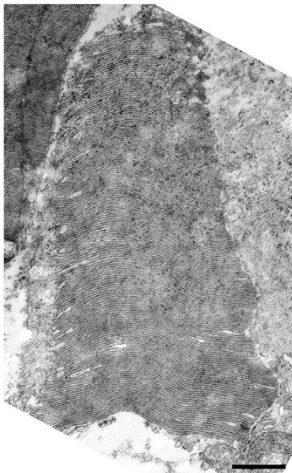

ii) *prom1*-null COS

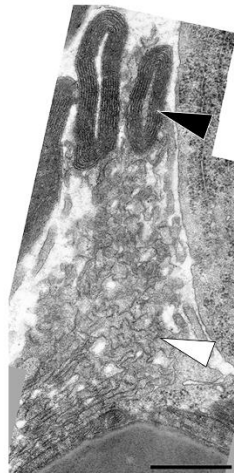

iii) *prom1*-null COS

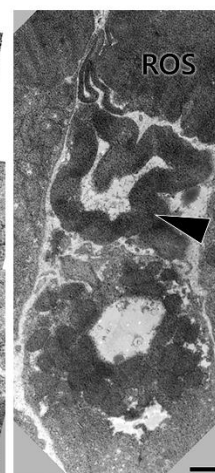

Figure 3. Transmission electron micrographs demonstrating the principal changes in ultrastructure of *prom1*-null mutants compared to wildtype controls. (a i) Wildtype ROS ultrastructure is highly ordered and consists of stacked OS membrane discs with properly formed hairpins (white arrowhead). Prom1-null ROS lack hairpins in the proper areas (a ii) and have a severely convoluted structure where the disc membranes appear to be bent over, folded, or exist in thin tracts (a iii, black arrowheads). There are some instances of disc membranes invaginating into the rod inner segment (a iii inset; black arrowhead = membrane discs, white arrowhead = hairpins). There are commonly hairpins at the top of the ROS (iv inset, white arrowheads = hairpins, black arrowhead = thin tract of disc membrane). (b i) Wildtype COS consist of cone-shaped ordered stacks of lamellae. (b ii, iii) Common features of *prom1*-null COS are loops of disc membrane that appear unattached to the CIS (ii-iii, black arrowhead), and the presence of thin, convoluted membranes above the CIS (ii, white arrowhead). Scale bar = 800 nm. *Abbreviations*: COS = cone outer segment, RIS = rod inner segment, ROS = rod outer segment.

Figure 4.

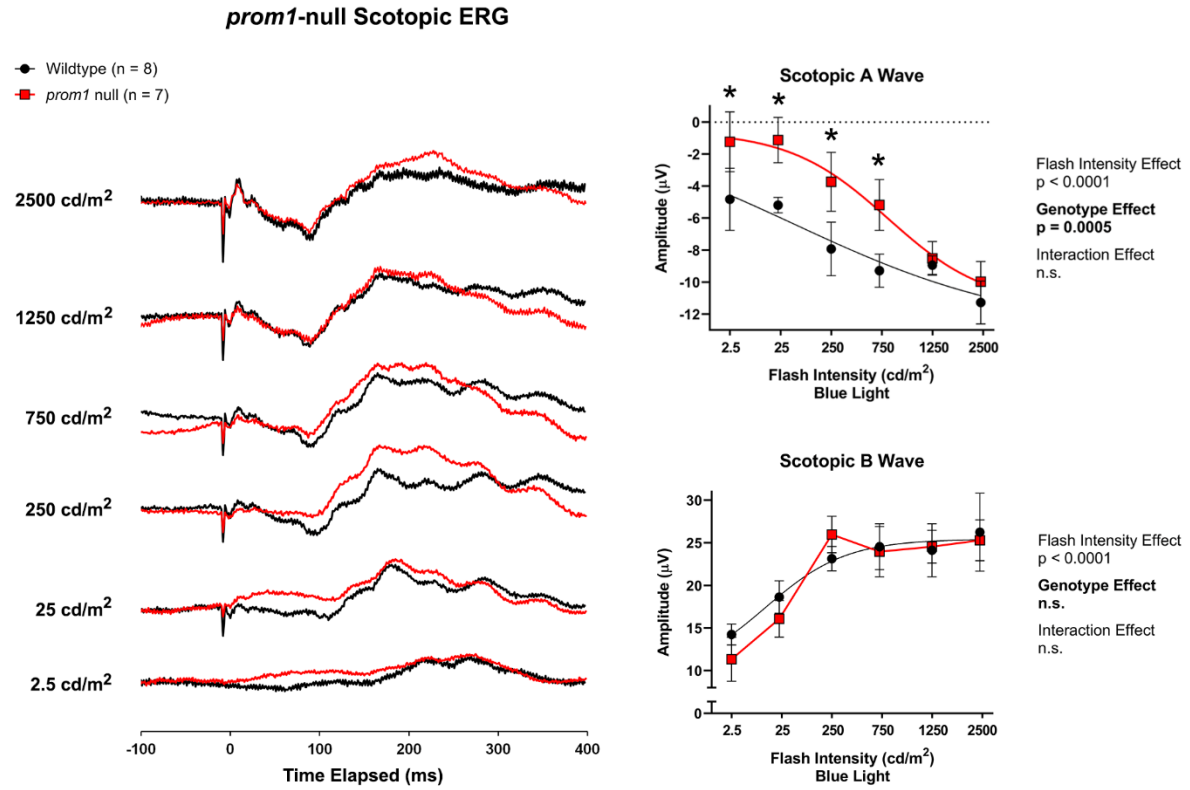

Figure 4. Averaged scotopic single-flash recordings from wildtype and *prom1*-null F0 animals (n = 7-8). Waterfall plots (left) and transformed linear regression curves (right) were used to visualize and compare wildtype and *prom1*-null ERG waveforms and A- and B-wave amplitudes. Data analysis utilized a Two-Way ANOVA with Sidak's post hoc test. Data are plotted as mean  $\pm$  SEM.

*Statistics:*  $p < 0.05$  \*.

Figure 5.

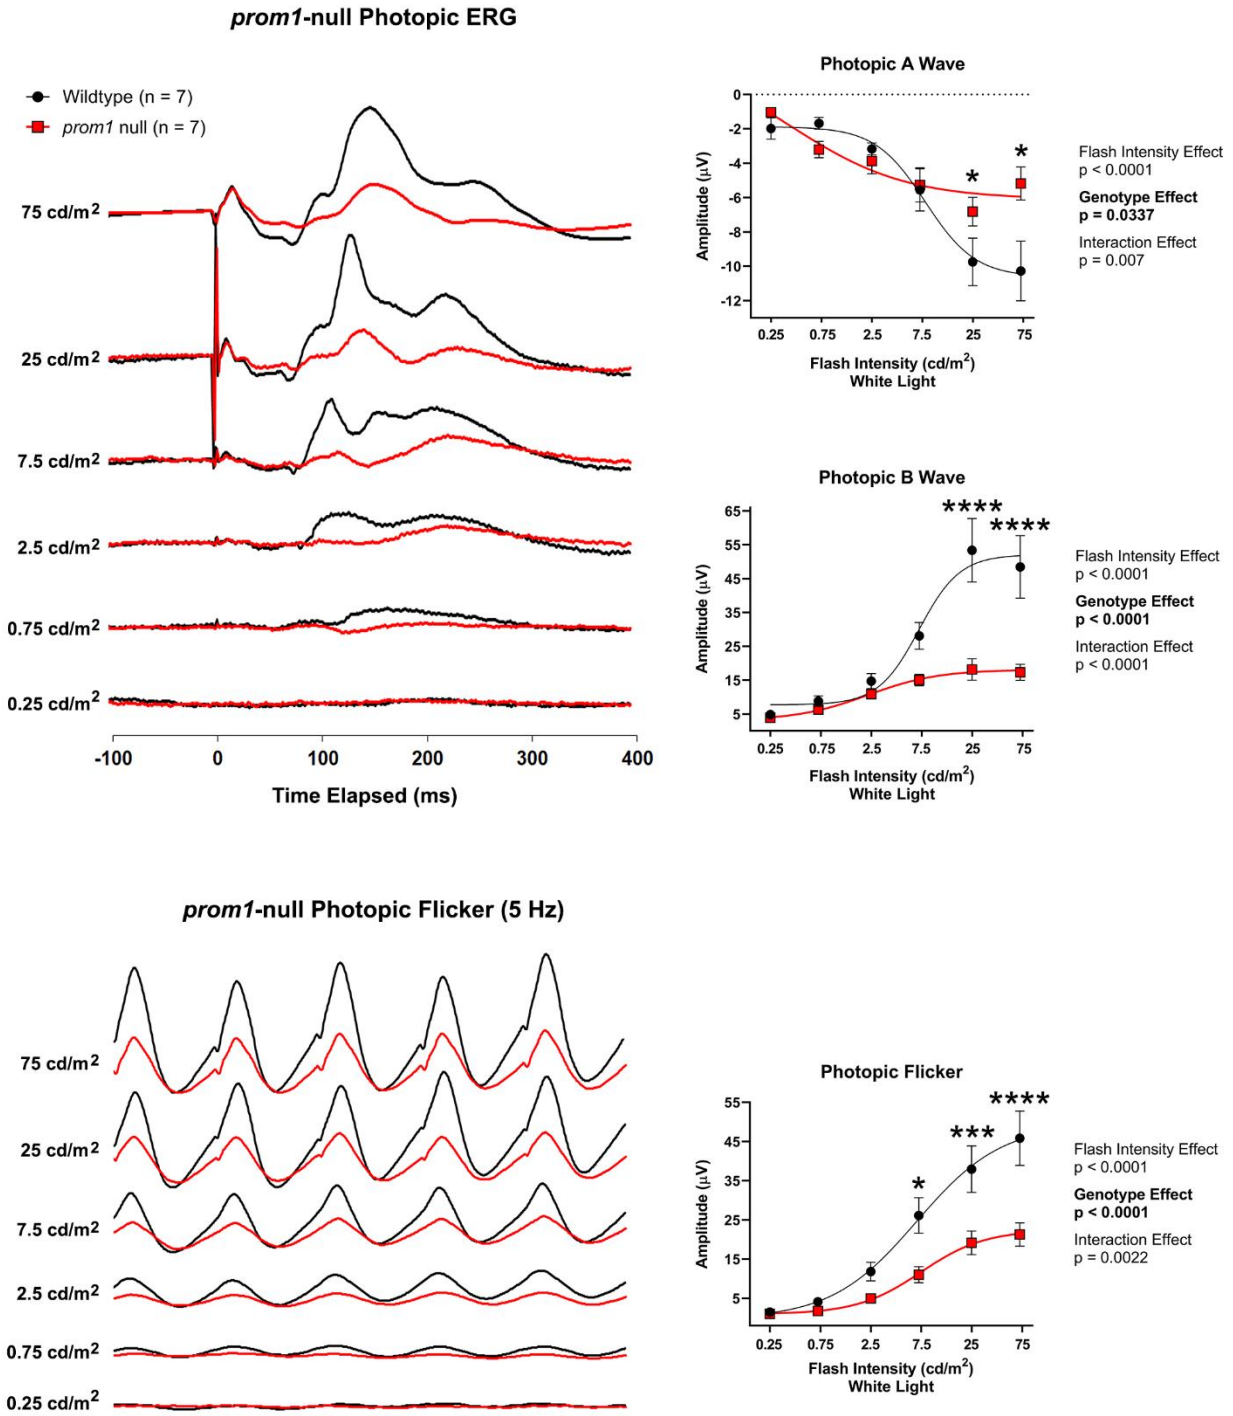



Figure 5. Averaged photopic single-flash and 5 Hz photopic flicker recordings from wildtype and *prom1*-null F0 animals (n = 7). Waterfall plots (left) and transformed linear regression curves (right) were used to visualize and compare wildtype and *prom1*-null A-wave, B-wave, and flicker responses. Data analysis utilized a Two-Way ANOVA with Sidak's post hoc test. Data are plotted as mean  $\pm$  SEM. *Statistics*: p < 0.05 \*, p < 0.001 \*\*\*, p < 0.0001 \*\*\*\*.

Figure 6.

(a) *cdhr1*-null: Localization of retinal proteins

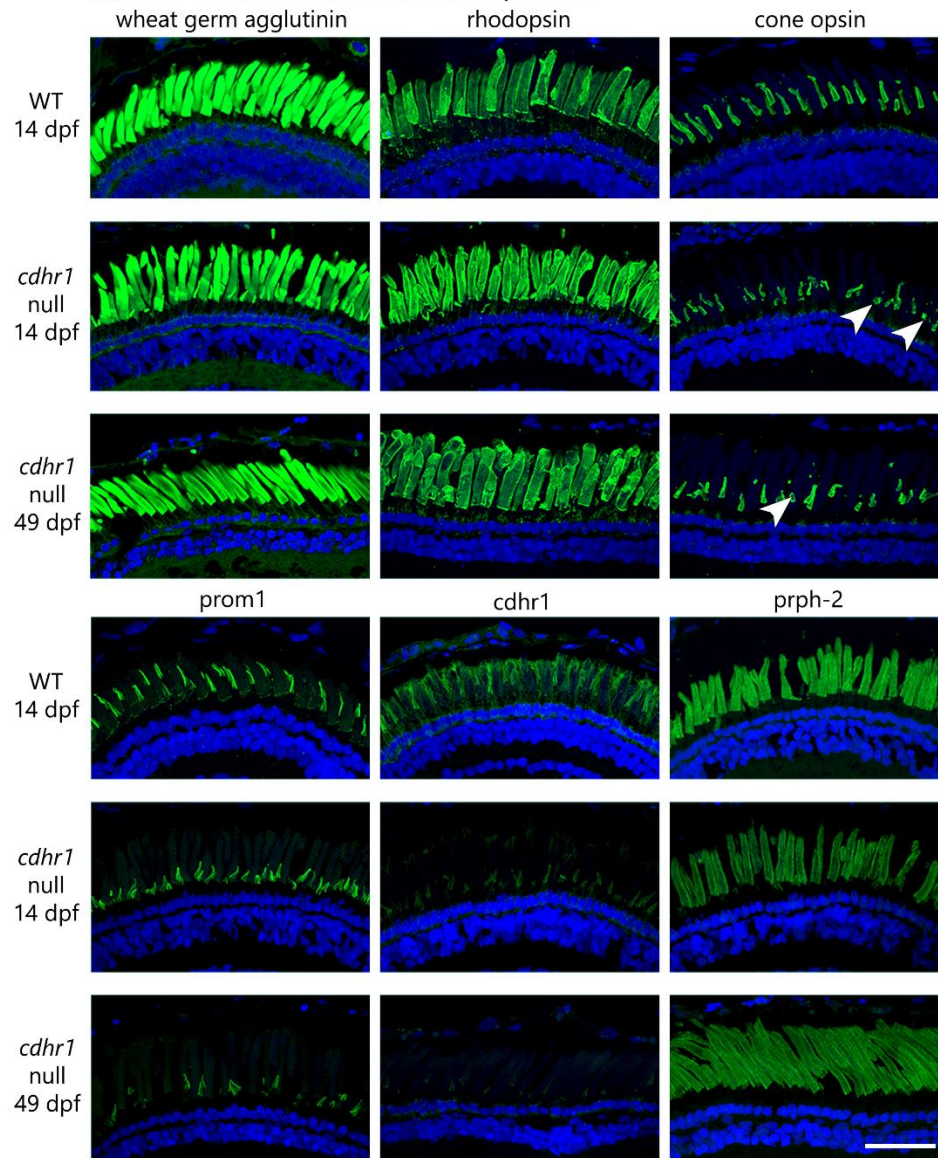

(b) *cdhr1*-null: ROS morphology

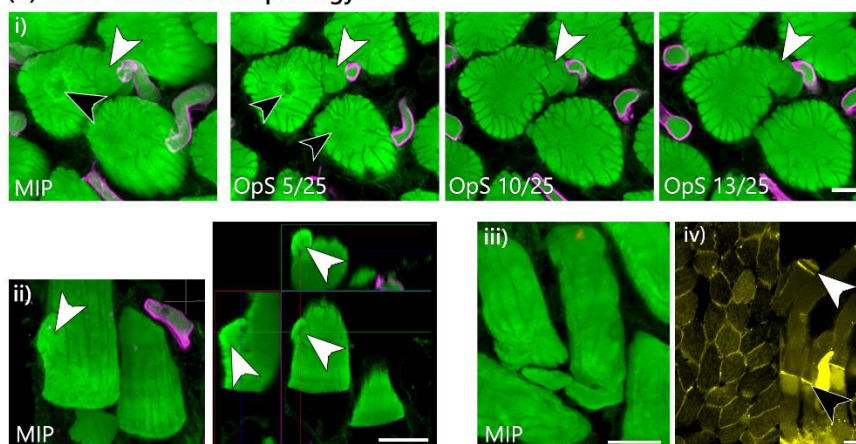

Figure 6. Immunolabelling of photoreceptor outer segment proteins in wildtype (14 dpf, top; n = 10) and F3 *cdhr1*-null (14 dpf, middle, n = 11; 42-43 dpf, bottom, n = 7) retinas. *Channels*: green = protein of interest, blue = Hoechst. Scale bar = 50  $\mu$ m. (b) Three different examples of overgrown membranes visualized by super-resolution microscopy in *cdhr1*-null ROS. (b i) A maximum intensity projection (left) and 4 optical sections (right) demonstrating the structure of a membrane overgrowth in a basal coronal section of ROS. Features of interest are the overgrown membrane (white arrowheads) and the holes or “pock-marking” at the base of the OS looking up from the inner segment (MIP & OpS 5/25, black arrowheads). (b ii) A side-view of overgrown disc membranes which appear to be comprised of a large overgrowth that folds back onto itself. (b iii) A long “tail” of overgrown disc membrane that extends from, and then loops under, the basal ROS. (b iv) Lucifer yellow staining of *cdhr1*-null ROS in the coronal (left) and sagittal (right) orientations; nascent discs are normally open to the extracellular space (black arrowheads), as are discs near the tip of the ROS (white arrowheads), but there is no abnormal Lucifer yellow dye penetration into the ROS. *Channels*: green = WGA, magenta = cone opsin, yellow = Lucifer yellow. Scale bars = 5  $\mu$ m. *Abbreviations*: dpf = days post-fertilization, prph-2 = peripherin-2, WT = wildtype.





Figure 7.

(a) *cdhr1*-null: ROS ultrastructure

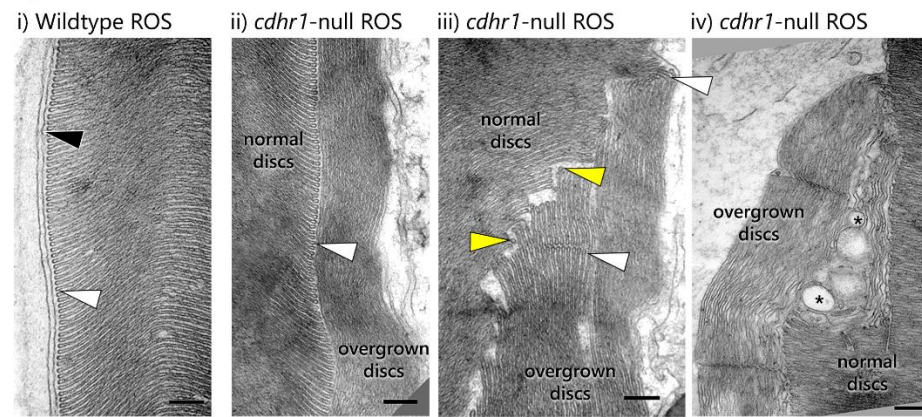

v) *cdhr1*-null ROS

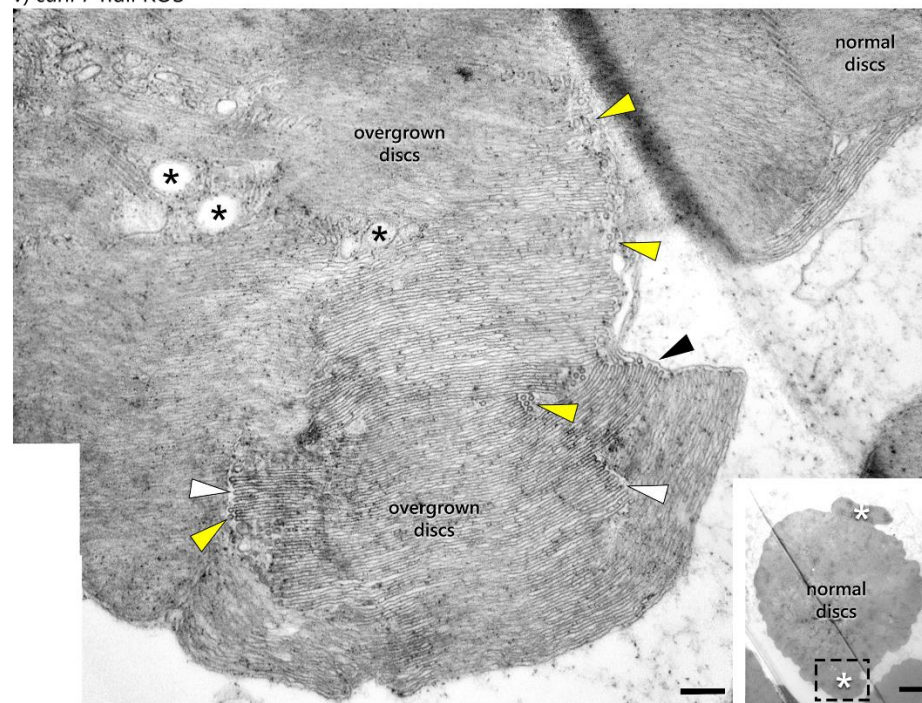

(b) *cdhr1*-null: COS ultrastructure

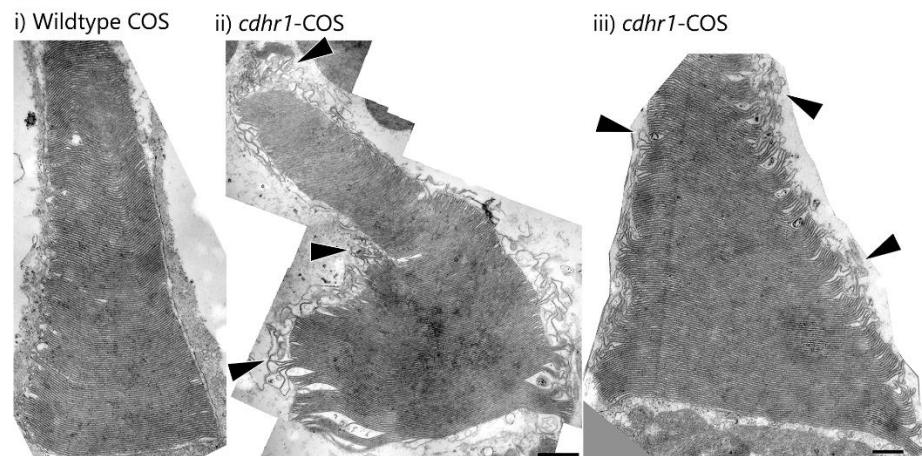

Figure 7. Transmission electron micrographs demonstrating the changes in ultrastructure of *cdhr1*-null mutants compared to wildtype controls. (a i) Wildtype ROS have organized structure with horizontal disc membranes and neatly-aligned hairpins. (a ii-iv) The principal feature of *cdhr1*-null ROS are overgrown discs that are oriented vertically instead of horizontally within the ROS plasma membrane. (a iii-v) Areas of overgrowth are commonly associated with large (asterisks) or small (yellow arrowheads) bubbles of membranes around the area where disc orientation changes occur. (a i-iii, v) Hairpins (white arrowheads) are present where disc membranes are overgrown and these areas of disc overgrowth or disorganization appear to be contained within the plasma membrane (v, black arrowhead). Overgrowth of disc membrane is easily seen when the ROS is in the coronal orientation (v, inset, white asterisks). (b i) Wildtype COS ultrastructure is also organized, with neatly-stacked and aligned disc membrane lamellae. (b ii-iii) Although the ultrastructure of COS is mostly retained, there are some examples of COS where the disc membranes are over- or under-grown, so that there is a loss of registration of disc membranes, giving the COS a frayed appearance. F0 & F3, n = 5; Scale bar = 200 nm except (v, inset), where the scale bar = 2  $\mu$ m. *Abbreviations:* COS = cone outer segment, ROS = rod outer segment.

Figure 8.

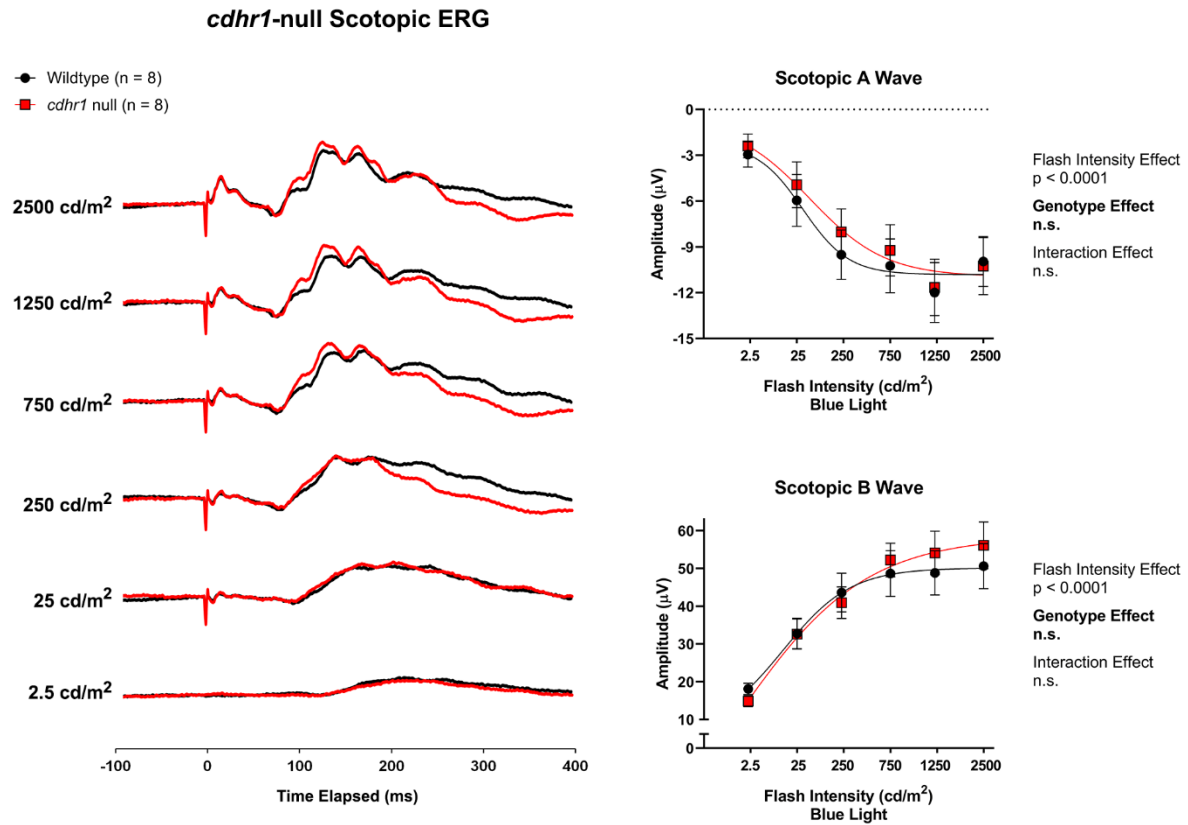

Figure 8. Averaged scotopic single-flash recordings from wildtype and *cdhr1*-null F3 animals (n = 8). Waterfall plots (left) and transformed linear regression curves (right) were used to visualize and compare wildtype and *cdhr1*-null A-wave and B-wave responses. Data analysis utilized a Two-Way ANOVA with Sidak's post hoc test. Data are plotted as mean  $\pm$  SEM.



Figure 9. *cdhr1*-null Photopic ERG

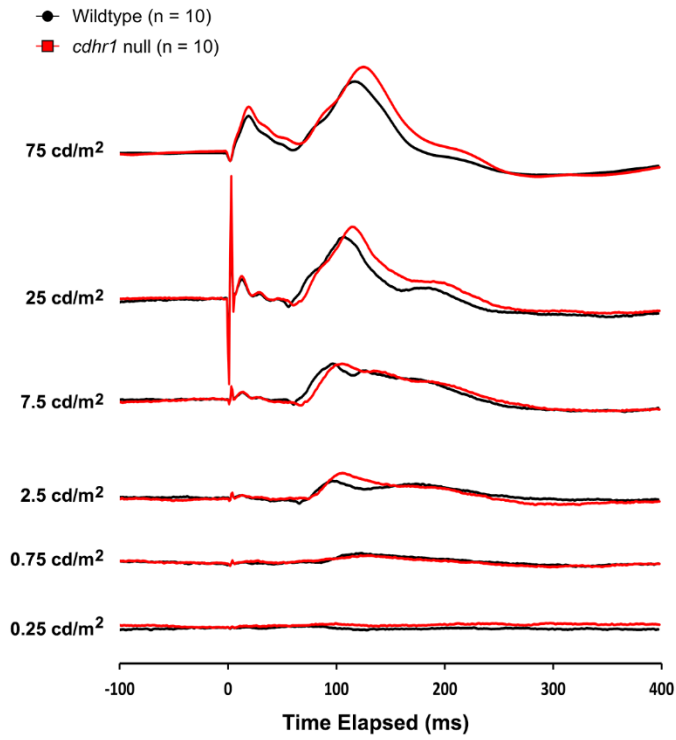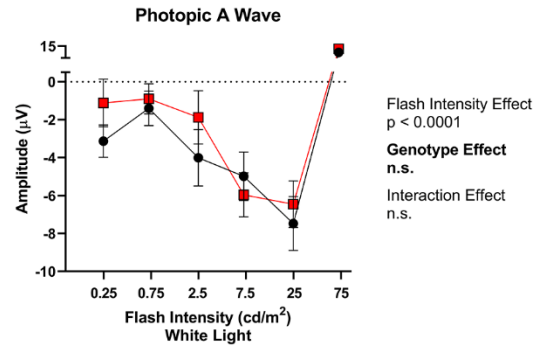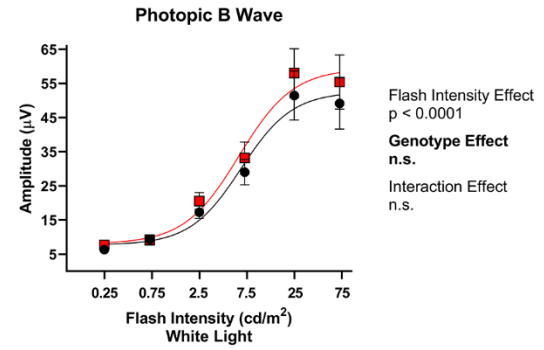

*cdhr1*-null Photopic Flicker (5 Hz)

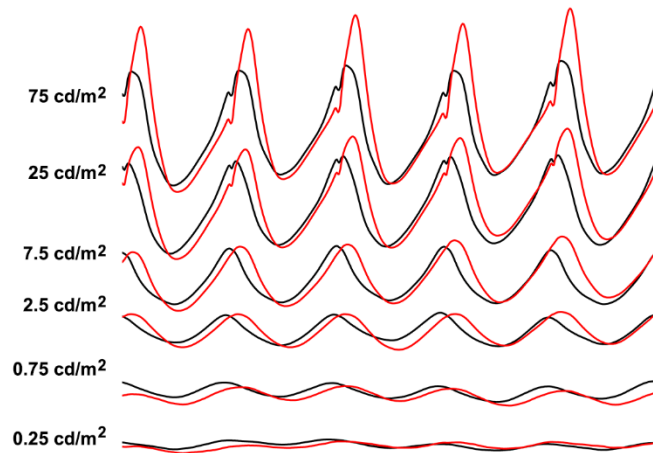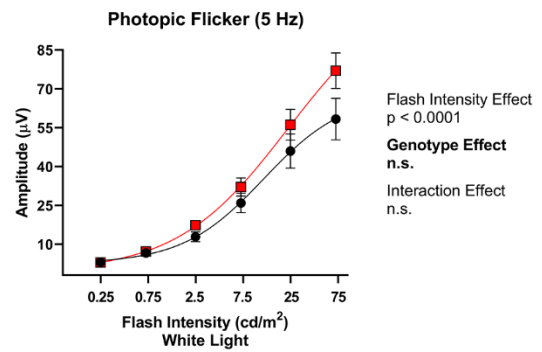

Figure 9. Averaged photopic single-flash and 5 Hz flicker recordings from wildtype and *cdhr1*-null F3 animals (n = 10). Waterfall plots (left) and transformed linear regression curves (right) used to visualize and compare wildtype and *cdhr1*-null A-wave, B-wave, and flicker responses. The large positive A-wave values at 75 cd/m<sup>2</sup> is likely an artefact introduced by the large early receptor potential response measured by the electrode used in this experiment. Data analysis utilized a two-way ANOVA with Sidak's post hoc test. Data are plotted as mean ± SEM.

Figure 10.

***prom1* + *cdhr1*-null: Localization of retinal proteins**

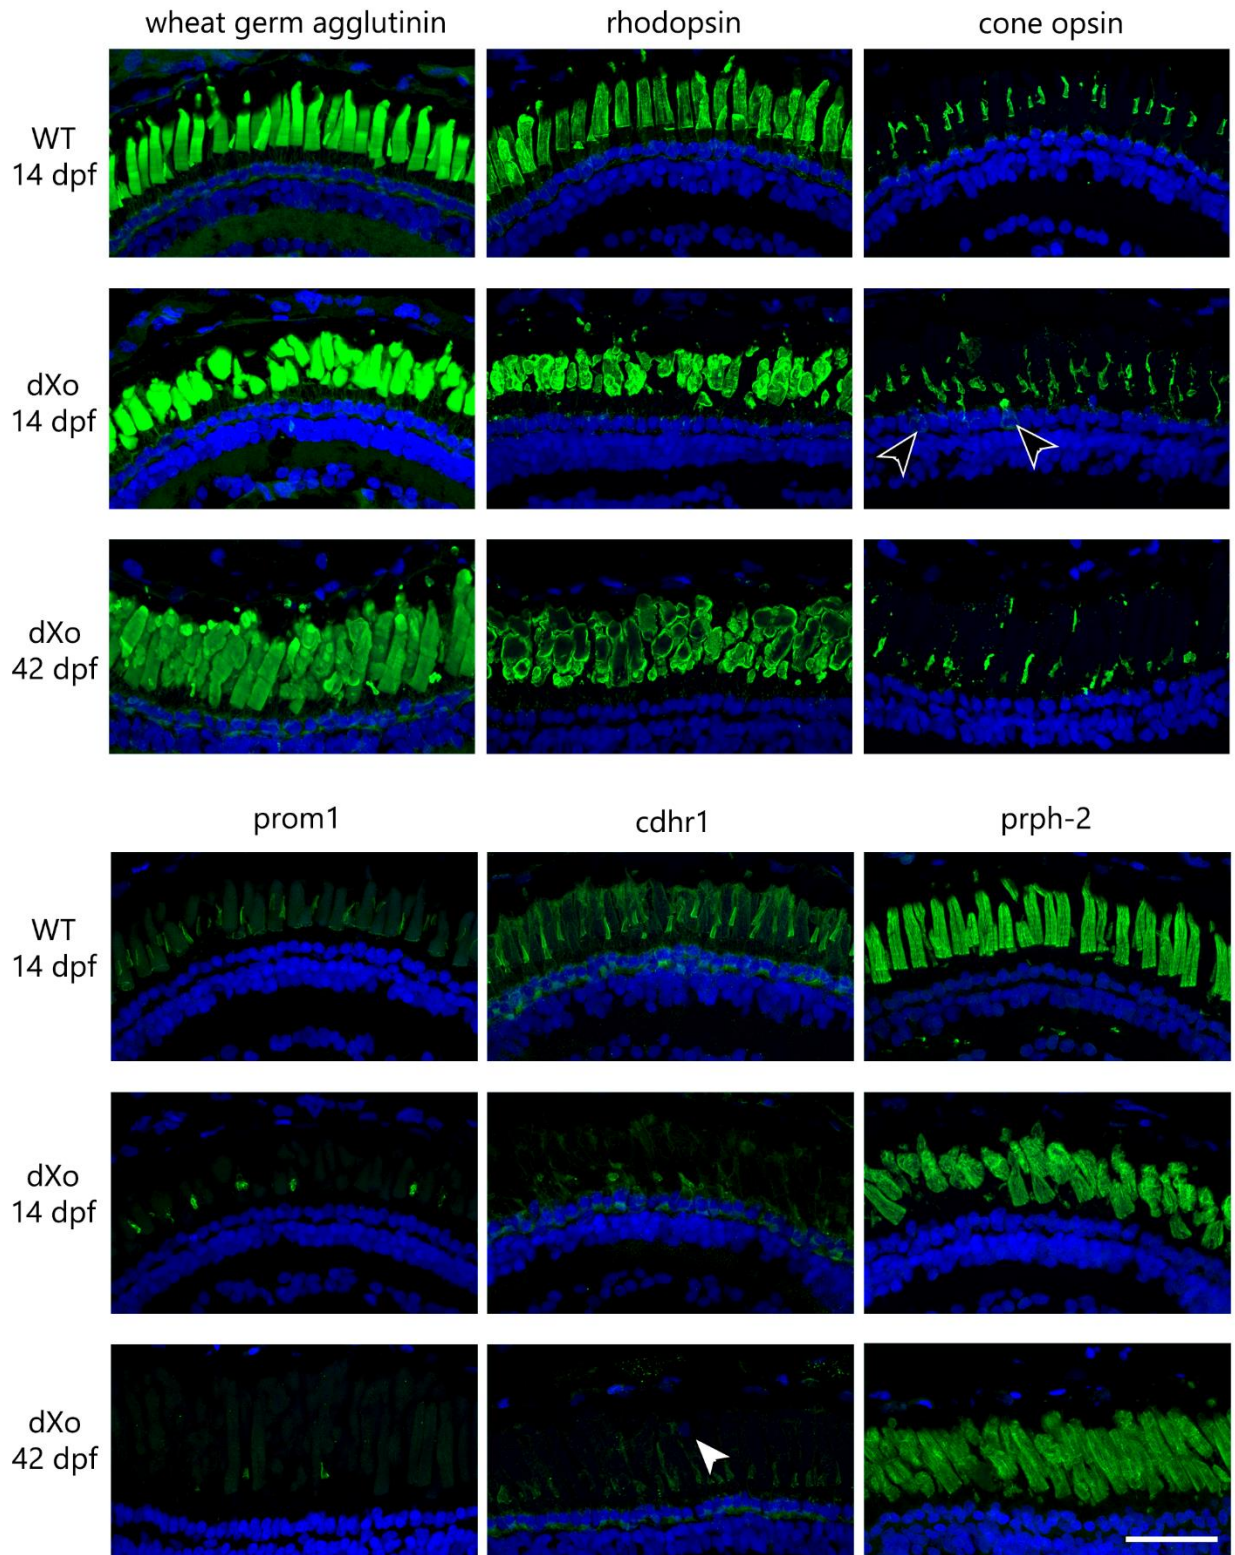

Figure 10. Immunolabelling of various photoreceptor outer segment proteins in wildtype (14 dpf, top; n = 11) and F0 *prom1* + *cdhr1*-null (14 dpf, middle, n = 14; 42-43 dpf, bottom, n = 7) retinas. Similar to *prom1*-null animals, there are occasional instances of mislocalization of cone opsin to the inner segment (black arrowheads) and an increase in condensed nuclei in the outer segment layer in older animals (white arrowhead). *Channels*: green = protein of interest, blue = Hoechst. Scale bar = 50  $\mu$ m. *Abbreviations*: dpf = days post-fertilization, dXo = double-null (*prom1* + *cdhr1*-null), prph-2 = peripherin-2, WT = wildtype.



Figure 11.

*prom1 + cdhr1*-null: ROS & COS ultrastructure

i) Wildtype ROS

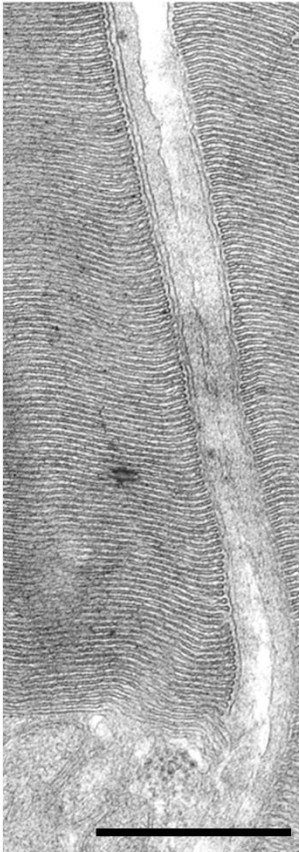

ii) Wildtype COS

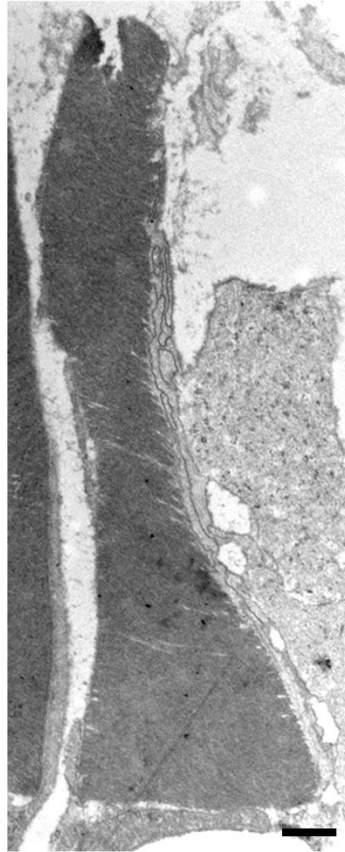

iv) dXo COS

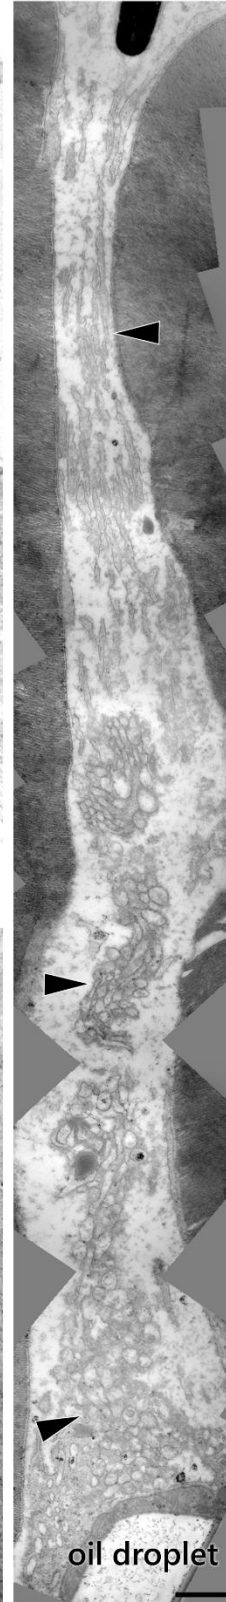

iii) dXo ROS

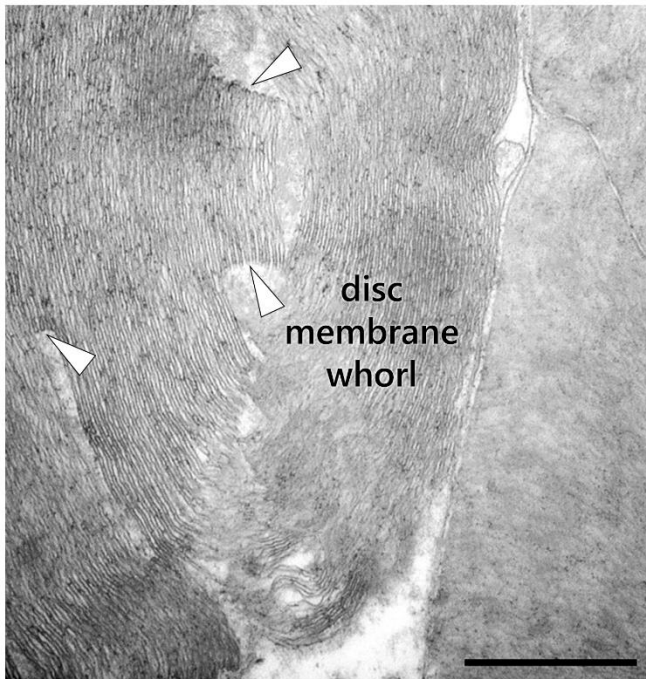

Figure 11. The ultrastructure of ROS and COS in *prom1 + cdhr1*-null mutant animals. OS defects are the same as those that were observed in *prom1*-null mutants; ROS are overgrown, convoluted, and membrane discs are comprised of folds, whorls, and stacks of membrane that contain hairpins (iii, white arrowheads). COS are similarly difficult to visualize, but are comprised of loose, convoluted and looped thin membranes (iv, black arrowheads). Scale bar = 800 nm. *Abbreviations:* COS = cone outer segment, dXo = double-null (*prom1 + cdhr1*-null), ROS = rod outer segment.

Figure 12.

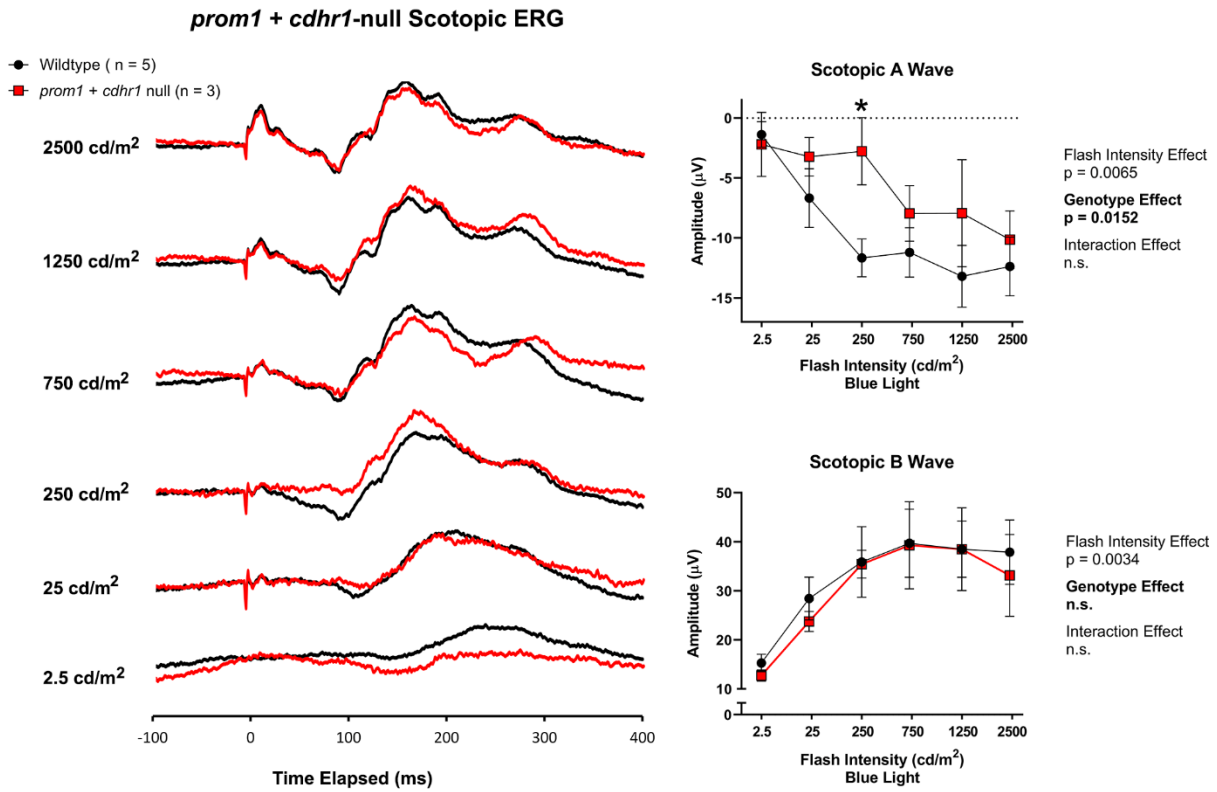

Figure 12. Averaged scotopic single-flash recordings from wildtype and *prom1 + cdhr1*-null F1 animals (n = 3-5). Waterfall plots (left) and transformed linear regression curves (right) were used to visualize and compare wildtype and *prom1 + cdhr1*-null A-wave and B-wave responses. Data analysis utilized a Two-Way ANOVA with Sidak's post hoc test. Data are plotted as mean  $\pm$  SEM.

*Statistics:*  $p < 0.05$  \*.



Figure 13.

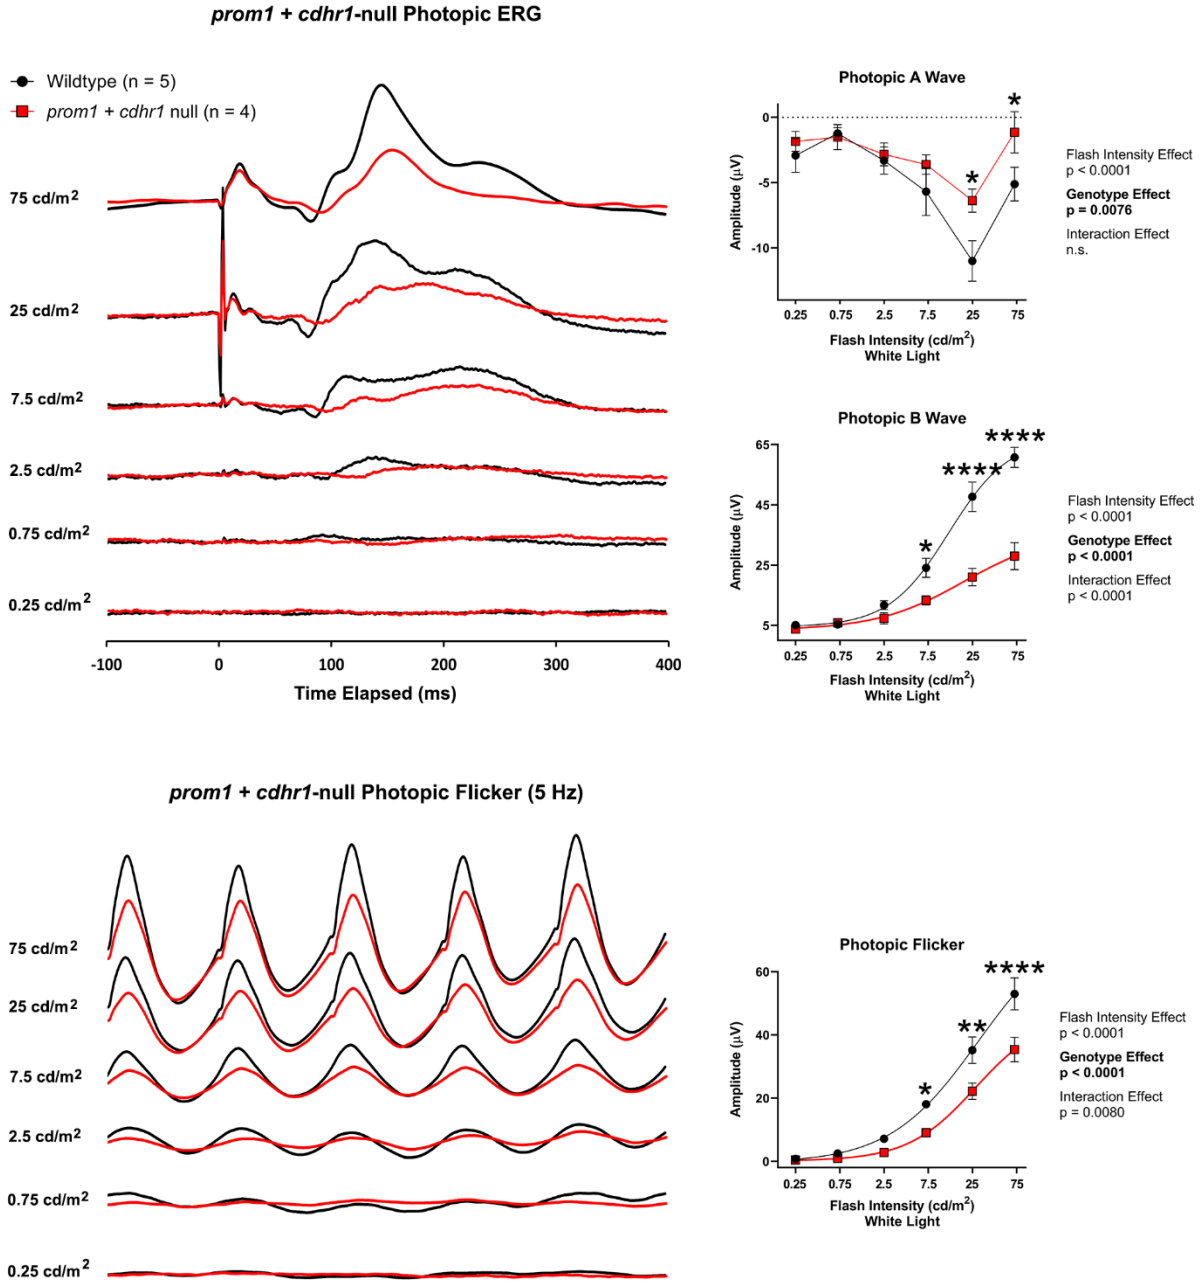

Figure 13. Averaged photopic single-flash and 5 Hz flicker recordings from wildtype and *prom1* + *cdhr1*-null F1 animals (n = 4-5). Waterfall plots (left) and transformed linear regression curves (right) were used to visualize and compare wildtype and *prom1* + *cdhr1*-null A-wave, B-wave, and flicker responses. Data analysis utilized a two-way ANOVA with Sidak's post hoc test. Data are plotted as mean  $\pm$  SEM. *Statistics*: p < 0.05 \*, p < 0.01 \*\*, p < 0.0001 \*\*\*\*.
